# Supplementary material for: Theoretical study on crystal polymorphism and electronic structure of lead(ii) phthalocyanine using model dimers
Source: Royal Society of Chemistry journal article supplement (doi:10.1039/c6ra27269j), 2017-01-01
Supplement: c6ra27269j1.pdf [file c6ra27269j1.pdf]

*Electronic Supplementary Information*

**Theoretical study on crystal polymorphisms and electronic structures of lead (II) phthalocyanine using model dimers**

Nobutsugu Hamamoto<sup>[a]</sup>, Hiromitsu Sonoda<sup>[a]</sup>, Michinori Sumimoto<sup>[b]</sup>, Kenji Hori<sup>[b]</sup> and  
Hitoshi Fujimoto<sup>[a]</sup>

<sup>[a]</sup>Department of Chemistry, Faculty of Science, Kumamoto University, 2-39-1 Kurokami, Kumamoto 860-8555, Japan, <sup>[b]</sup>Graduate School of Science and Engineering, Yamaguchi University, Tokiwadai, Ube 755-8611, Japan

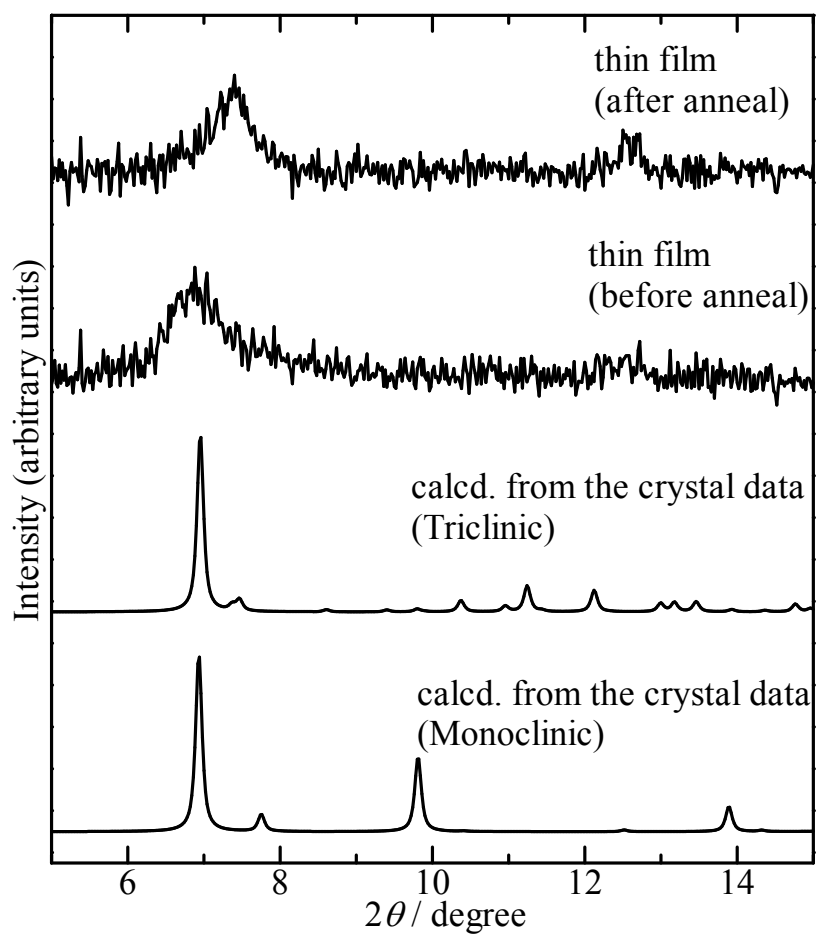

**Fig. S1.** The X-ray powder pattern of the evaporated thin film of PbPc. The diffraction patterns were consistent with the results reported by A. Miyamoto *et al.* (reference 36).

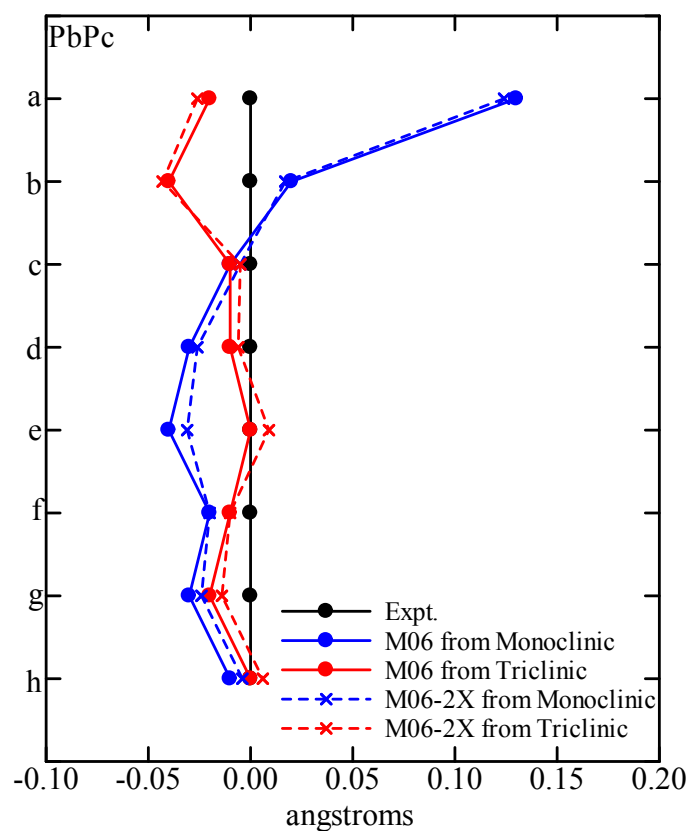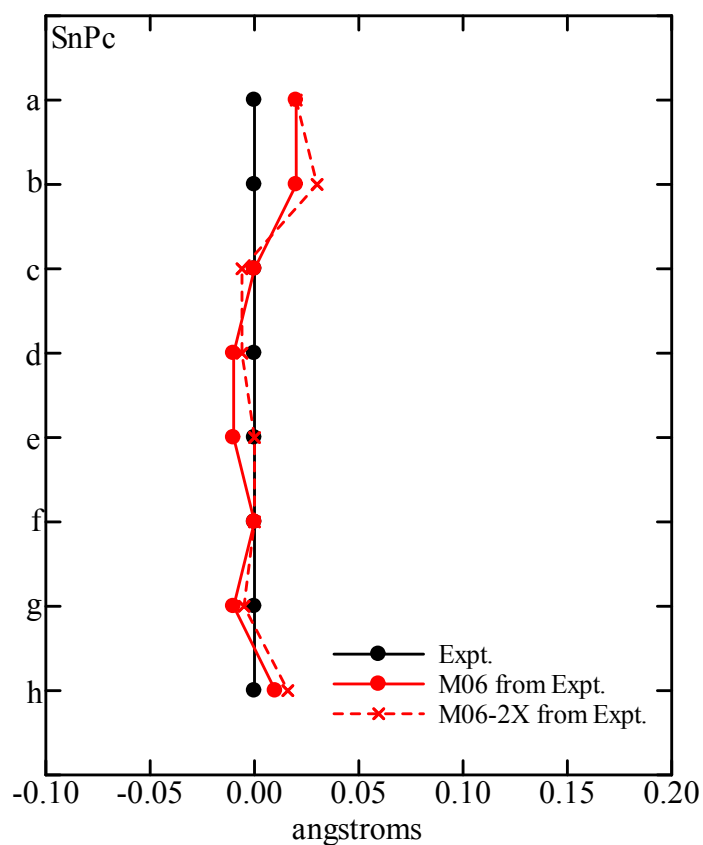

**Fig. S2.** Comparison of main calculated bond lengths (coloured solid and broken lines for M06 and M06-2x, respectively) with X-ray crystallographic data for PbPc (references 5 and 6 for monoclinic and triclinic, respectively) and SnPc (reference 10).

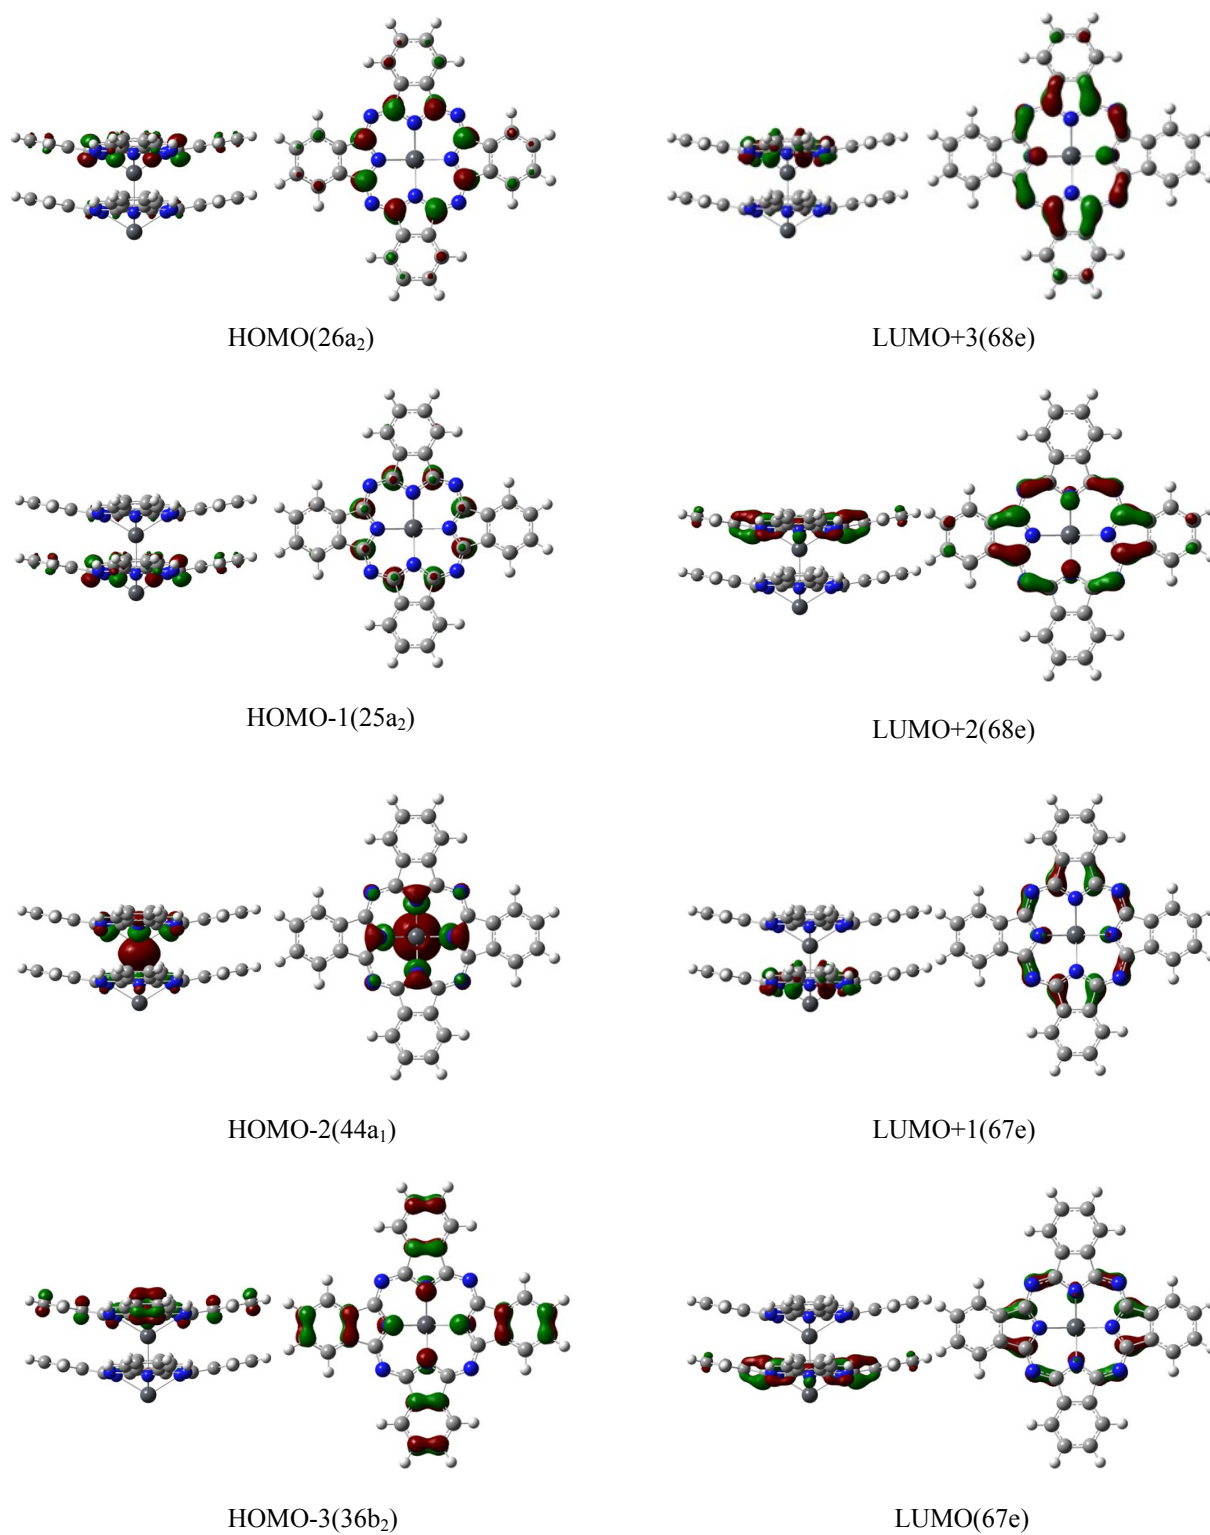

**Fig. S3.** Several molecular orbitals near the HOMO and LUMO of the Type 1 dimer. The orbital symmetries are labeled under the  $C_{4v}$  symmetry.

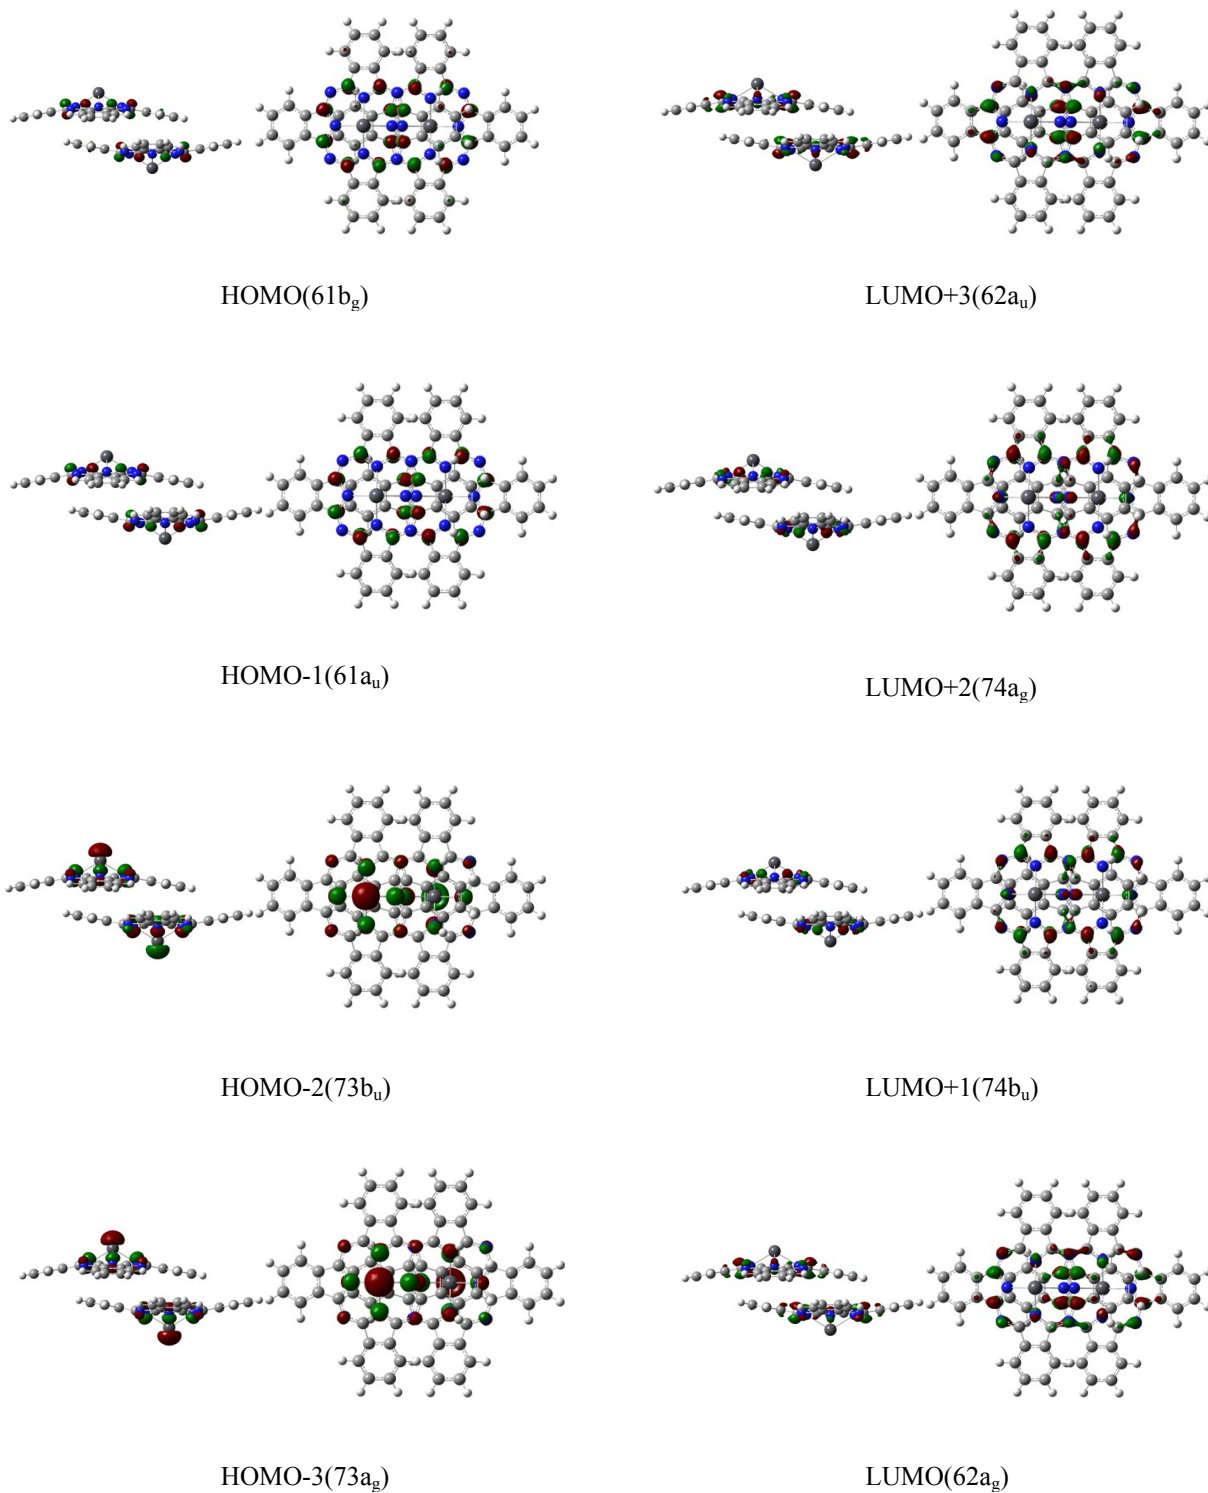

**Fig. S4.** Several molecular orbitals near the HOMO and LUMO of the Type 2 dimer. The orbital symmetries are labeled under the  $C_{2h}$  symmetry.

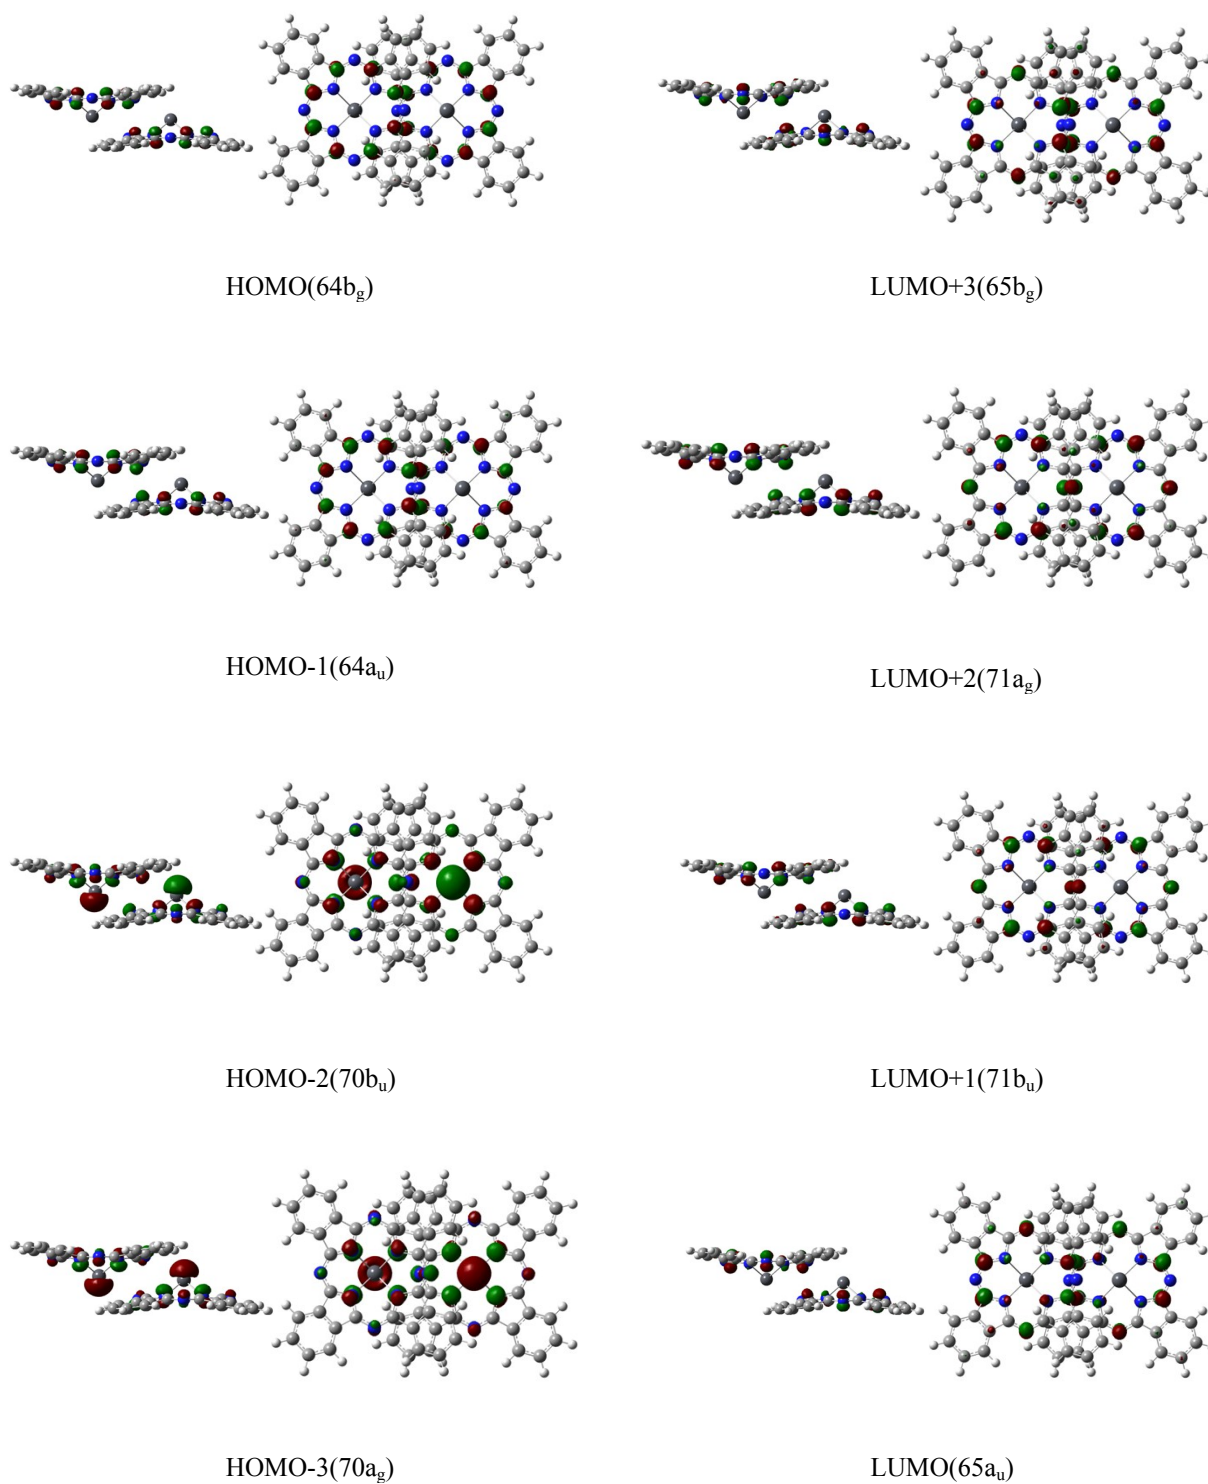

**Fig. S5.** Several molecular orbitals near the HOMO and LUMO of the Type 3 dimer. The orbital symmetries are labeled under the  $C_{2h}$  symmetry.

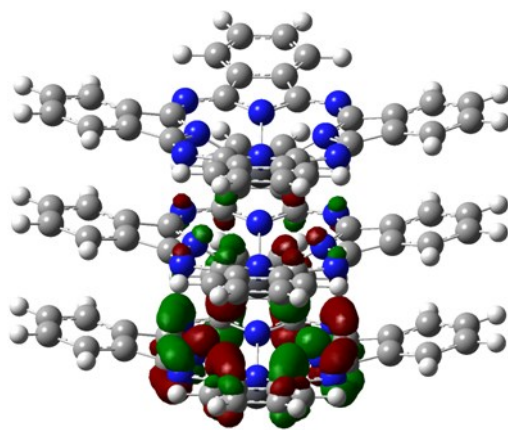

LUMO(127e)

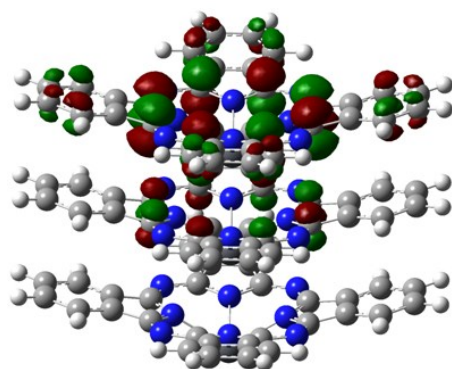

HOMO(27a<sub>2</sub>)

**Fig. S6.** HOMO and LUMO of the Type 4 PbPc trimer. The orbital symmetries are labeled under the  $C_{4v}$

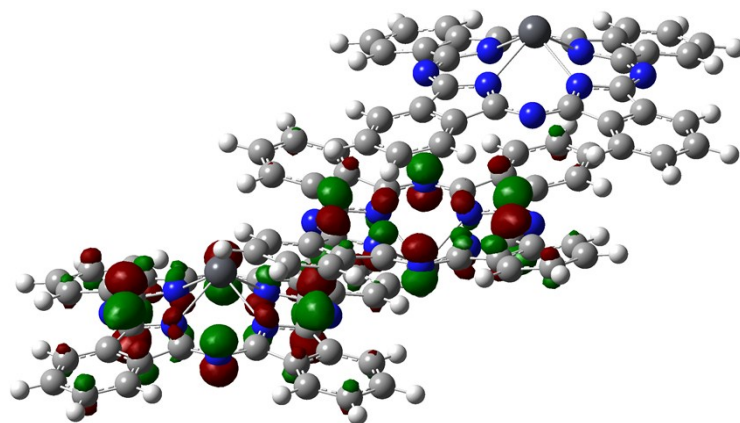

LUMO(403a)

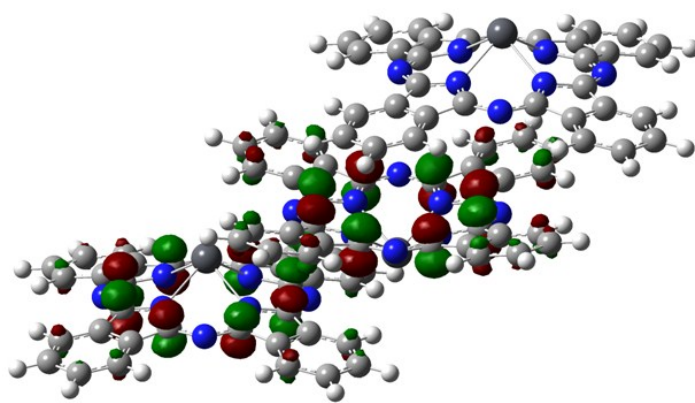

HOMO(402a)

**Fig. S7.** HOMO and LUMO of the Type 5 PbPc trimer. The orbital symmetries are labeled under the  $C_1$



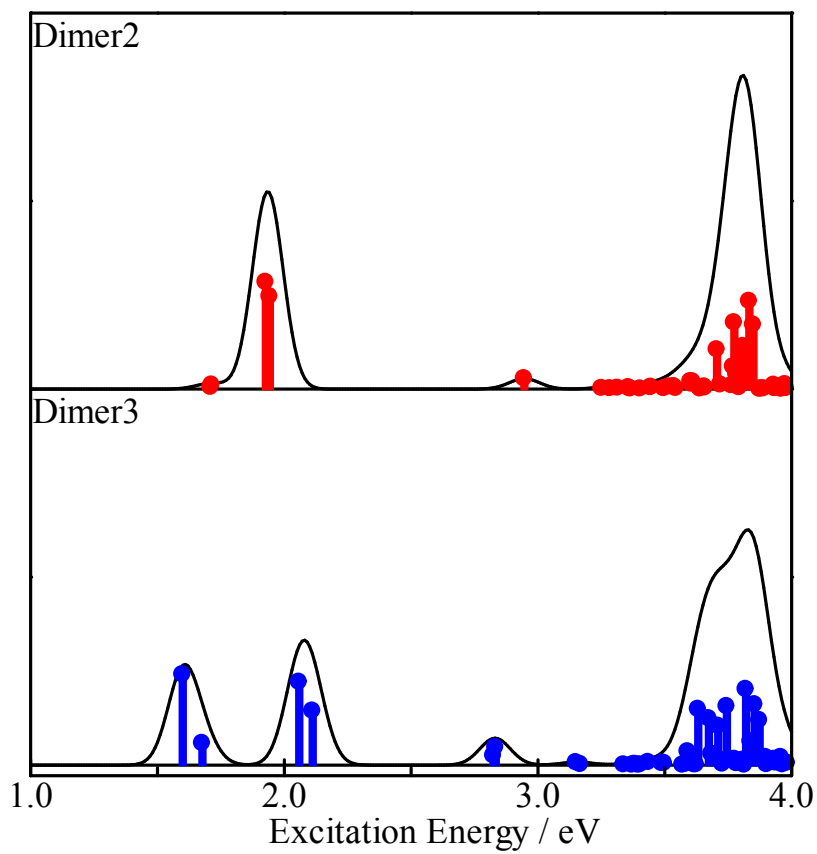

**Fig. S8.** Excited states of the Types 2 (red) and 3 (blue) dimers of PbPc obtained by the TD-M06 calculation.

**Table S1** Differences of the total energy between the models and the corresponding components obtained by the M06 method. The values with the M06-2X method are also shown in parenthesis.

|        | $\Delta E$ [kcal mol <sup>-1</sup> ] |           |
|--------|--------------------------------------|-----------|
|        | PbPc                                 | SnPc      |
| Type 1 | -25.7 (-25.7)                        | -19.3 (-) |
| Type 2 | -25.2 (-25.7)                        | -25.2 (-) |
| Type 3 | -23.8 (-25.4)                        | -23.8 (-) |
| Type 4 | -52.4 (-)                            | -38.9 (-) |
| Type 5 | -48.7 (-)                            | -48.7 (-) |

**Table S2.** Elemental analysis of PbPc.

|                  | Analyses (%) |      |       |
|------------------|--------------|------|-------|
|                  | C            | H    | N     |
| Measured value   | 53.44        | 2.35 | 15.69 |
| Calculated value | 53.40        | 2.24 | 15.57 |

**Table S3.** M06-Optimized parameters and X-ray observed bond lengths for monoclinic and triclinic systems of PbPc and triclinic systems of SnPc in Å. The results with M06-2x are also shown in parentheses.

|   | PbPc ( $C_{4v}$ ) |                                  | SnPc ( $C_{4v}$ )               |               |                                 |
|---|-------------------|----------------------------------|---------------------------------|---------------|---------------------------------|
|   | Calc.             | Expt.<br>Monoclinic <sup>a</sup> | Expt.<br>Triclinic <sup>b</sup> | Calc.         | Expt.<br>Triclinic <sup>c</sup> |
| a | 2.34 (2.33)       | 2.21                             | 2.36                            | 2.272 (2.270) | 2.25                            |
| b | 3.65 (3.65)       | 3.63                             | 3.69                            | 3.595 (3.596) | 3.57                            |
| c | 1.36 (1.36)       | 1.37                             | 1.37                            | 1.367 (1.367) | 1.373                           |
| d | 1.32 (1.32)       | 1.35                             | 1.33                            | 1.321 (1.322) | 1.328                           |
| e | 1.45 (1.46)       | 1.49                             | 1.45                            | 1.449 (1.456) | 1.456                           |
| f | 1.39 (1.39)       | 1.41                             | 1.40                            | 1.387 (1.390) | 1.390                           |
| g | 1.38 (1.39)       | 1.41                             | 1.40                            | 1.384 (1.385) | 1.390                           |
| h | 1.40 (1.41)       | 1.41                             | 1.40                            | 1.403 (1.406) | 1.390                           |

<sup>a</sup> Values from reference 5. <sup>b</sup> Values from reference 6. <sup>c</sup> Values from reference 10.

**Table S4.** Orbital energies near frontier orbitals optimized by the M06 method for PbPc monomer, dimers and Trimers. Corresponding orbitals are indicated by the same colors.

| Monomer          |                | Dimer            |                |                  |                | Trimer           |                |                  |                |          |                |
|------------------|----------------|------------------|----------------|------------------|----------------|------------------|----------------|------------------|----------------|----------|----------------|
|                  |                | Type 1           |                | Type 2           |                | Type 3           |                | Type 4           |                | Type 5   |                |
| Symmetry         | Orbital energy | Symmetry | Orbital energy |
| 34e              | -2.977         | 68e              | -2.977         | 62a <sub>u</sub> | -2.884         | 65b <sub>g</sub> | -2.825         | 129e             | -2.322         | 408a     | -2.776         |
| 13a <sub>2</sub> | -5.284         | 67e              | -5.284         | 74a <sub>g</sub> | -2.912         | 71a <sub>g</sub> | -2.950         | 128e             | -2.810         | 407a     | -2.890         |
| 22a <sub>1</sub> | -6.890         | 26a <sub>2</sub> | -4.871         | 74b <sub>u</sub> | -2.919         | 71b <sub>u</sub> | -2.967         | 127e             | -3.306         | 406a     | -2.915         |
|                  |                | 25a <sub>2</sub> | -5.477         | 62b <sub>g</sub> | -2.921         | 65a <sub>u</sub> | -3.078         | 27a <sub>2</sub> | -4.647         | 405a     | -2.920         |
|                  |                | 44a <sub>1</sub> | -6.077         | 61b <sub>g</sub> | -5.166         | 64b <sub>g</sub> | -5.107         | 26a <sub>2</sub> | -5.099         | 404a     | -2.932         |
|                  |                | 36b <sub>2</sub> | -6.826         | 61a <sub>u</sub> | -5.259         | 64a <sub>u</sub> | -5.442         | 25a <sub>2</sub> | -5.567         | 403a     | -3.043         |
|                  |                |                  |                | 73b <sub>u</sub> | -6.782         | 70b <sub>u</sub> | -6.678         | 51a <sub>1</sub> | -5.821         | 402a     | -5.052         |
|                  |                |                  |                | 73a <sub>g</sub> | -6.828         | 70a <sub>g</sub> | -6.783         | 50a <sub>1</sub> | -6.239         | 401a     | -5.217         |
|                  |                |                  |                |                  |                |                  |                | 39b <sub>2</sub> | -6.615         | 400a     | -5.408         |
|                  |                |                  |                |                  |                |                  |                |                  |                | 399a     | -6.647         |
|                  |                |                  |                |                  |                |                  |                |                  |                | 398a     | -6.750         |
|                  |                |                  |                |                  |                |                  |                |                  |                | 397a     | -6.811         |

**Table S5.** Symmetry-allowed TD-M06 excited states of the Type 1 dimer.

|          | State | Main configuration( $ C  \geq 0.30$ )                              | $E^a$ | $f^b$  | $p^c$ |
|----------|-------|--------------------------------------------------------------------|-------|--------|-------|
| $C_{4v}$ | 1E    | -0.32(26a <sub>2</sub> →67e)[21%]+0.63(26a <sub>2</sub> →67e)[79%] | 1.01  | 0.0001 | x+y   |
|          |       | +0.63(26a <sub>2</sub> →67e)[79%]+0.32(26a <sub>2</sub> →67e)[21%] | 1.01  | 0.0001 | x+y   |
|          | 2E    | -0.48(25a <sub>2</sub> →67e)[45%]+0.37(26a <sub>2</sub> →68e)[27%] | 1.69  | 0.006  | x+y   |
|          |       | +0.48(25a <sub>2</sub> →67e)[45%]-0.37(26a <sub>2</sub> →68e)[27%] | 1.69  | 0.006  | x+y   |
|          | 3E    | +0.47(44a <sub>1</sub> →67e)[45%]-0.40(26a <sub>2</sub> →68e)[32%] | 1.90  | 0.219  | x+y   |
|          |       | -0.47(44a <sub>1</sub> →67e)[45%]-0.40(26a <sub>2</sub> →68e)[32%] | 1.90  | 0.219  | x+y   |
|          | 4E    | +0.46(44a <sub>1</sub> →67e)[42%]-0.32(26a <sub>2</sub> →68e)[20%] | 2.05  | 0.256  | x+y   |
|          |       | +0.46(44a <sub>1</sub> →67e)[42%]+0.32(26a <sub>2</sub> →68e)[20%] | 2.05  | 0.256  | x+y   |
|          | 5E    | +0.68(25a <sub>2</sub> →68e)[92%]                                  | 2.28  | 0.006  | x+y   |
|          |       | +0.68(25a <sub>2</sub> →68e)[92%]                                  | 2.28  | 0.006  | x+y   |
|          | 6E    | -0.68(44a <sub>1</sub> →68e)[92%]                                  | 2.59  | 0.012  | x+y   |
|          |       | +0.68(44a <sub>1</sub> →68e)[92%]                                  | 2.59  | 0.012  | x+y   |
|          | 7E    | +0.63(42a <sub>1</sub> →67e)[80%]                                  | 2.84  | 0.003  | x+y   |
|          |       | +0.63(42a <sub>1</sub> →67e)[80%]                                  | 2.84  | 0.003  | x+y   |

<sup>a</sup>Excitation energy in eV. <sup>b</sup>Oscillator strength. <sup>c</sup>Transition moment direction.

**Table S6.** Symmetry-allowed TD-M06 excited states of the Type 2 dimer.

|                  | State                                           | Main Configuration( $ C  \geq 0.30$ )                                                                                                         | $E^a$ | $f^b$ | $p^c$ |
|------------------|-------------------------------------------------|-----------------------------------------------------------------------------------------------------------------------------------------------|-------|-------|-------|
| $C_{2h}$         | 1B <sub>u</sub>                                 | -0.44(61a <sub>u</sub> →62b <sub>g</sub> )[39%]+0.55(61b <sub>g</sub> →62a <sub>u</sub> )[61%]                                                | 1.71  | 0.009 | x+y   |
|                  | 1A <sub>u</sub>                                 | +0.39(61a <sub>u</sub> →74a <sub>g</sub> )[30%]+0.59(61b <sub>g</sub> →74b <sub>u</sub> )[69%]                                                | 1.71  | 0.022 | z     |
|                  | 2B <sub>u</sub>                                 | +0.54(61a <sub>u</sub> →62b <sub>g</sub> )[58%]+0.43(61b <sub>g</sub> →62a <sub>u</sub> )[36%]                                                | 1.93  | 0.568 | x+y   |
|                  | 2A <sub>u</sub>                                 | +0.58(61a <sub>u</sub> →74a <sub>g</sub> )[66%]-0.37(61b <sub>g</sub> →74b <sub>u</sub> )[28%]                                                | 1.94  | 0.492 | z     |
|                  | 3A <sub>u</sub>                                 | +0.43(73a <sub>g</sub> →62a <sub>u</sub> )[37%]+0.52(73b <sub>u</sub> →62b <sub>g</sub> )[55%]                                                | 2.94  | 0.049 | z     |
|                  | 3B <sub>u</sub>                                 | -0.46(73a <sub>g</sub> →74b <sub>u</sub> )[43%]+0.50(73b <sub>u</sub> →74a <sub>g</sub> )[50%]                                                | 2.95  | 0.057 | x+y   |
|                  | 4A <sub>u</sub>                                 | +0.53(72a <sub>g</sub> →62a <sub>u</sub> )[57%]+0.32(73a <sub>g</sub> →62a <sub>u</sub> )[21%]-0.30(73b <sub>u</sub> →62b <sub>g</sub> )[19%] | 3.25  | 0.004 | z     |
|                  | 4B <sub>u</sub>                                 | +0.31(72a <sub>g</sub> →74b <sub>u</sub> )[19%]+0.43(73a <sub>g</sub> →74b <sub>u</sub> )[36%]+0.40(73b <sub>u</sub> →74a <sub>g</sub> )[32%] | 3.28  | 0.002 | x+y   |
|                  | 5A <sub>u</sub>                                 | -0.36(72a <sub>g</sub> →62a <sub>u</sub> )[26%]+0.40(73a <sub>g</sub> →62a <sub>u</sub> )[33%]                                                | 3.31  | 0.005 | z     |
|                  | 5B <sub>u</sub>                                 | -0.31(72b <sub>u</sub> →74a <sub>g</sub> )[20%]+0.40(72a <sub>g</sub> →74b <sub>u</sub> )[31%]-0.31(61b <sub>g</sub> →63a <sub>u</sub> )[19%] | 3.36  | 0.008 | x+y   |
|                  | 6A <sub>u</sub>                                 | -0.35(60b <sub>g</sub> →74b <sub>u</sub> )[24%]+0.43(72b <sub>u</sub> →62b <sub>g</sub> )[38%]                                                | 3.36  | 0.003 | z     |
|                  | 6B <sub>u</sub>                                 | -0.30(72b <sub>u</sub> →74a <sub>g</sub> )[18%]+0.53(61b <sub>g</sub> →63a <sub>u</sub> )[56%]                                                | 3.37  | 0.001 | x+y   |
|                  | 7B <sub>u</sub>                                 | +0.36(72b <sub>u</sub> →74a <sub>g</sub> )[26%]+0.40(72a <sub>g</sub> →74b <sub>u</sub> )[31%]                                                | 3.40  | 0.001 | x+y   |
|                  | 8B <sub>u</sub>                                 | -0.32(57a <sub>u</sub> →62b <sub>g</sub> )[21%]+0.39(57b <sub>g</sub> →62a <sub>u</sub> )[30%]                                                | 3.44  | 0.008 | x+y   |
|                  | 7A <sub>u</sub>                                 | +0.31(57a <sub>u</sub> →74a <sub>g</sub> )[19%]+0.42(57b <sub>g</sub> →74b <sub>u</sub> )[35%]                                                | 3.45  | 0.010 | z     |
|                  | 8A <sub>u</sub>                                 | +0.52(61b <sub>g</sub> →75b <sub>u</sub> )[54%]                                                                                               | 3.50  | 0.003 | z     |
|                  | 9B <sub>u</sub>                                 | +0.32(61a <sub>u</sub> →64b <sub>g</sub> )[21%]+0.52(61b <sub>g</sub> →64a <sub>u</sub> )[54%]                                                | 3.52  | 0.012 | x+y   |
|                  | 10B <sub>u</sub>                                | -0.32(60a <sub>u</sub> →62b <sub>g</sub> )[20%]+0.44(60b <sub>g</sub> →62a <sub>u</sub> )[38%]                                                | 3.54  | 0.013 | x+y   |
| 9A <sub>u</sub>  | +0.39(69b <sub>u</sub> →62b <sub>g</sub> )[30%] | 3.54                                                                                                                                          | 0.004 | z     |       |
| 11B <sub>u</sub> | +0.49(61a <sub>u</sub> →63b <sub>g</sub> )[48%] | 3.60                                                                                                                                          | 0.040 | x+y   |       |

<sup>a</sup>Excitation energy in eV. <sup>b</sup>Oscillator strength. <sup>c</sup>Transition moment direction.

**Table S7.** Symmetry-allowed TD-M06 excited states of the Type 3 dimer.

|          | State            | Main configuration( $ C  \geq 0.30$ )                                                                                                         | $E^a$ | $f^b$ | $p^c$ |
|----------|------------------|-----------------------------------------------------------------------------------------------------------------------------------------------|-------|-------|-------|
| $C_{2h}$ | 1B <sub>u</sub>  | +0.70(64b <sub>g</sub> →65a <sub>u</sub> )[98%]                                                                                               | 1.60  | 0.481 | x+y   |
|          | 1A <sub>u</sub>  | +0.67(64b <sub>g</sub> →71b <sub>u</sub> )[90%]                                                                                               | 1.68  | 0.116 | z     |
|          | 2A <sub>u</sub>  | +0.66(64a <sub>u</sub> →71a <sub>g</sub> )[87%]                                                                                               | 2.06  | 0.441 | z     |
|          | 2B <sub>u</sub>  | +0.69(64a <sub>u</sub> →65b <sub>g</sub> )[95%]                                                                                               | 2.11  | 0.287 | x+y   |
|          | 3A <sub>u</sub>  | +0.58(70a <sub>g</sub> →65a <sub>u</sub> )[66%]-0.37(70b <sub>u</sub> →65b <sub>g</sub> )[27%]                                                | 2.83  | 0.050 | z     |
|          | 3B <sub>u</sub>  | +0.43(70a <sub>g</sub> →71b <sub>u</sub> )[37%]+0.53(70b <sub>u</sub> →71a <sub>g</sub> )[56%]                                                | 2.83  | 0.094 | x+y   |
|          | 4B <sub>u</sub>  | +0.53(70a <sub>g</sub> →71b <sub>u</sub> )[57%]-0.44(70b <sub>u</sub> →71a <sub>g</sub> )[38%]                                                | 3.15  | 0.013 | x+y   |
|          | 4A <sub>u</sub>  | +0.38(70a <sub>g</sub> →65a <sub>u</sub> )[29%]+0.57(70b <sub>u</sub> →65b <sub>g</sub> )[65%]                                                | 3.17  | 0.003 | z     |
|          | 5B <sub>u</sub>  | +0.60(63b <sub>g</sub> →65a <sub>u</sub> )[73%]                                                                                               | 3.34  | 0.001 | x+y   |
|          | 5A <sub>u</sub>  | +0.43(63a <sub>u</sub> →71a <sub>g</sub> )[37%]+0.48(63b <sub>g</sub> →71b <sub>u</sub> )[46%]                                                | 3.37  | 0.000 | z     |
|          | 6A <sub>u</sub>  | +0.65(64b <sub>g</sub> →72b <sub>u</sub> )[84%]                                                                                               | 3.38  | 0.004 | z     |
|          | 6B <sub>u</sub>  | +0.37(62b <sub>g</sub> →65a <sub>u</sub> )[28%]+0.31(69a <sub>g</sub> →71b <sub>u</sub> )[19%]-0.30(64b <sub>g</sub> →66a <sub>u</sub> )[19%] | 3.40  | 0.000 | x+y   |
|          | 7A <sub>u</sub>  | +0.31(62b <sub>g</sub> →71b <sub>u</sub> )[20%]+0.43(69a <sub>g</sub> →65a <sub>u</sub> )[36%]                                                | 3.40  | 0.001 | z     |
|          | 7B <sub>u</sub>  | +0.60(64b <sub>g</sub> →66a <sub>u</sub> )[72%]                                                                                               | 3.44  | 0.014 | x+y   |
|          | 8A <sub>u</sub>  | +0.34(65a <sub>g</sub> →65a <sub>u</sub> )[23%]-0.30(65b <sub>u</sub> →65b <sub>g</sub> )[18%]                                                | 3.49  | 0.009 | z     |
|          | 8B <sub>u</sub>  | +0.39(65b <sub>u</sub> →71a <sub>g</sub> )[30%]                                                                                               | 3.50  | 0.010 | x+y   |
|          | 9A <sub>u</sub>  | -0.35(64a <sub>u</sub> →72a <sub>g</sub> )[24%]+0.50(64b <sub>g</sub> →73b <sub>u</sub> )[50%]                                                | 3.57  | 0.000 | z     |
|          | 10A <sub>u</sub> | -0.33(62a <sub>u</sub> →71a <sub>g</sub> )[21%]+0.34(69a <sub>g</sub> →65a <sub>u</sub> )[23%]                                                | 3.58  | 0.004 | z     |
|          | 9B <sub>u</sub>  | +0.38(62b <sub>g</sub> →65a <sub>u</sub> )[30%]+0.34(69b <sub>u</sub> →71a <sub>g</sub> )[23%]                                                | 3.59  | 0.071 | x+y   |
|          | 11A <sub>u</sub> | +0.44(64a <sub>u</sub> →72a <sub>g</sub> )[39%]                                                                                               | 3.62  | 0.001 | z     |

<sup>a</sup>Excitation energy in eV. <sup>b</sup>Oscillator strength. <sup>c</sup>Transition moment direction.



**Table S8.** Symmetry-allowed TD-M06 excited states of the Type 4 trimer.

|          | State | Main configuration( $ C  \geq 0.30$ )                                                                  | $E^a$ | $f^b$  | $p^c$ |
|----------|-------|--------------------------------------------------------------------------------------------------------|-------|--------|-------|
| $C_{4v}$ | 1E    | +0.69(27a <sub>2</sub> →127e)[96%]                                                                     | 0.786 | 0.0002 | x+y   |
|          |       | +0.69(27a <sub>2</sub> →127e)[96%]                                                                     | 0.786 | 0.0002 | x+y   |
|          | 2E    | +0.55(26a <sub>2</sub> →127e)[60%]+0.44(27a <sub>2</sub> →128e)[38%]                                   | 1.178 | 0.0001 | x+y   |
|          |       | +0.55(26a <sub>2</sub> →127e)[60%]+0.44(27a <sub>2</sub> →128e)[38%]                                   | 1.178 | 0.0001 | x+y   |
|          | 3E    | -0.43(26a <sub>2</sub> →127e)[37%]+0.54(27a <sub>2</sub> →128e)[59%]                                   | 1.272 | 0.001  | x+y   |
|          |       | -0.43(26a <sub>2</sub> →127e)[37%]+0.54(27a <sub>2</sub> →128e)[59%]                                   | 1.272 | 0.001  | x+y   |
|          | 4E    | -0.40(25a <sub>2</sub> →127e)[32%]+0.55(26a <sub>2</sub> →128e)[60%]                                   | 1.664 | 0.002  | x+y   |
|          |       | -0.40(25a <sub>2</sub> →127e)[32%]+0.55(26a <sub>2</sub> →128e)[60%]                                   | 1.664 | 0.002  | x+y   |
|          | 5E    | -0.45(25a <sub>2</sub> →127e)[40%]+0.48(27a <sub>2</sub> →129e)[47%]                                   | 1.736 | 0.007  | x+y   |
|          |       | -0.45(25a <sub>2</sub> →127e)[40%]+0.48(27a <sub>2</sub> →129e)[47%]                                   | 1.736 | 0.007  | x+y   |
|          | 6E    | +0.62(51a <sub>1</sub> →127e)[76%]                                                                     | 1.823 | 0.038  | x+y   |
|          |       | +0.62(51a <sub>1</sub> →127e)[76%]                                                                     | 1.823 | 0.038  | x+y   |
|          | 7E    | -0.35(50a <sub>1</sub> →127e)[24%]+0.31(26a <sub>2</sub> →128e)[19%]+0.36(27a <sub>2</sub> →129e)[26%] | 1.964 | 0.318  | x+y   |
|          |       | +0.35(50a <sub>1</sub> →127e)[24%]+0.31(26a <sub>2</sub> →128e)[19%]+0.36(27a <sub>2</sub> →129e)[26%] | 1.964 | 0.318  | x+y   |
|          | 8E    | +0.57(50a <sub>1</sub> →127e)[64%]                                                                     | 2.071 | 0.160  | x+y   |
|          |       | +0.57(50a <sub>1</sub> →127e)[64%]                                                                     | 2.071 | 0.160  | x+y   |
|          | 9E    | +0.58(25a <sub>2</sub> →128e)[67%]                                                                     | 2.148 | 0.001  | x+y   |
|          |       | +0.58(25a <sub>2</sub> →128e)[67%]                                                                     | 2.148 | 0.001  | x+y   |
|          | 10E   | -0.30(25a <sub>2</sub> →128e)[18%]+0.59(26a <sub>2</sub> →129e)[70%]                                   | 2.190 | 0.001  | x+y   |
|          |       | -0.30(25a <sub>2</sub> →128e)[18%]+0.59(26a <sub>2</sub> →129e)[70%]                                   | 2.190 | 0.001  | x+y   |
|          | 11E   | +0.60(51a <sub>1</sub> →128e)[72%]                                                                     | 2.233 | 0.079  | x+y   |
|          |       | +0.60(51a <sub>1</sub> →128e)[72%]                                                                     | 2.233 | 0.079  | x+y   |

|                 |                                                                      |       |        |     |
|-----------------|----------------------------------------------------------------------|-------|--------|-----|
| 12E             | +0.66(50a <sub>1</sub> →128e)[86%]                                   | 2.538 | 0.0001 | x+y |
|                 | +0.66(50a <sub>1</sub> →128e)[86%]                                   | 2.538 | 0.0001 | x+y |
| 13E             | +0.67(51a <sub>1</sub> →129e)[89%]                                   | 2.583 | 0.005  | x+y |
|                 | +0.67(51a <sub>1</sub> →129e)[89%]                                   | 2.583 | 0.005  | x+y |
| 14E             | +0.55(49a <sub>1</sub> →127e)[60%]                                   | 2.845 | 0.003  | x+y |
|                 | +0.55(49a <sub>1</sub> →127e)[60%]                                   | 2.845 | 0.003  | x+y |
| 15E             | +0.51(48a <sub>1</sub> →127e)[53%]-0.35(49a <sub>1</sub> →127e)[24%] | 2.857 | 0.001  | x+y |
|                 | +0.51(48a <sub>1</sub> →127e)[53%]-0.35(49a <sub>1</sub> →127e)[24%] | 2.857 | 0.001  | x+y |
| 1A <sub>1</sub> | +0.43(126e→127e)[37%]-0.43(126e→127e)[37%]                           | 2.884 | 0.001  | z   |

<sup>a</sup>Excitation energy in eV. <sup>b</sup>Oscillator strength. <sup>c</sup>Transition moment direction.

---

**Table S9.** Symmetry-allowed TD-M06 excited states of the Type 5 trimer.

|       | State | Main configuration( $ C  \geq 0.30$ )                           | $E^a$ | $f^b$ |
|-------|-------|-----------------------------------------------------------------|-------|-------|
| $C_1$ | 1A    | +0.69(402a→403a)[95%]                                           | 1.57  | 0.369 |
|       | 2A    | +0.42(402a→404a)[35%]+0.46(402a→405a)[43%]                      | 1.61  | 0.008 |
|       | 3A    | +0.46(402a→404a)[42%]-0.31(402a→407a)[19%]                      | 1.63  | 0.021 |
|       | 4A    | -0.40(402a→405a)[32%]+0.53(402a→406a)[56%]                      | 1.64  | 0.018 |
|       | 5A    | +0.53(402a→407a)[57%]                                           | 1.67  | 0.046 |
|       | 6A    | +0.58(401a→403a)[68%]                                           | 1.68  | 0.063 |
|       | 7A    | -0.40(401a→405a)[31%]-0.31(401a→406a)[19%]+0.47(401a→407a)[44%] | 1.74  | 0.006 |
|       | 8A    | +0.34(400a→403a)[23%]+0.60(402a→408a)[72%]                      | 1.77  | 0.002 |
|       | 9A    | +0.35(400a→403a)[24%]+0.50(401a→406a)[51%]                      | 1.85  | 0.213 |
|       | 10A   | +0.45(401a→405a)[40%]+0.46(401a→407a)[42%]                      | 1.87  | 0.176 |
|       | 11A   | +0.49(400a→403a)[47%]-0.32(401a→406a)[20%]-0.32(402a→408a)[21%] | 1.93  | 0.042 |
|       | 12A   | +0.33(400a→404a)[22%]+0.52(401a→404a)[54%]                      | 1.95  | 0.005 |
|       | 13A   | -0.36(400a→404a)[26%]+0.47(401a→404a)[43%]                      | 1.98  | 0.015 |
|       | 14A   | +0.64(401a→408a)[82%]                                           | 2.03  | 0.032 |
|       | 15A   | +0.46(400a→404a)[43%]+0.31(400a→405a)[19%]                      | 2.05  | 0.469 |
|       | 16A   | +0.59(400a→406a)[70%]                                           | 2.10  | 0.015 |
|       | 17A   | +0.46(400a→405a)[42%]+0.47(400a→407a)[44%]                      | 2.10  | 0.021 |
|       | 18A   | +0.67(400a→408a)[89%]                                           | 2.13  | 0.224 |
|       | 19A   | +0.63(399a→403a)[78%]                                           | 2.77  | 0.001 |
|       | 20A   | -0.34(399a→405a)[23%]+0.44(399a→407a)[38%]                      | 2.82  | 0.015 |
|       | 21A   | +0.58(398a→403a)[67%]+0.32(399a→408a)[21%]                      | 2.83  | 0.039 |
|       | 22A   | +0.51(398a→404a)[52%]-0.41(399a→404a)[33%]                      | 2.85  | 0.070 |

|     |                                            |      |       |
|-----|--------------------------------------------|------|-------|
| 23A | +0.44(397a→406a)[38%]+0.39(397a→407a)[30%] | 2.94 | 0.024 |
| 24A | +0.48(397a→405a)[46%]-0.41(397a→406a)[33%] | 2.94 | 0.030 |
| 25A | +0.41(398a→404a)[33%]+0.54(399a→404a)[58%] | 3.14 | 0.004 |
| 26A | +0.32(399a→406a)[20%]+0.39(399a→407a)[30%] | 3.15 | 0.001 |
| 27A | +0.53(399a→408a)[55%]                      | 3.18 | 0.002 |
| 29A | -0.32(398a→405a)[21%]+0.35(398a→407a)[24%] | 3.19 | 0.003 |
| 30A | +0.33(396a→403a)[21%]                      | 3.20 | 0.005 |
| 31A | +0.62(402a→409a)[76%]                      | 3.23 | 0.001 |
| 33A | +0.48(398a→408a)[46%]                      | 3.26 | 0.003 |
| 34A | +0.44(396a→407a)[38%]+0.33(397a→403a)[22%] | 3.26 | 0.003 |
| 35A | +0.39(397a→407a)[31%]                      | 3.29 | 0.001 |
| 36A | +0.35(395a→403a)[24%]                      | 3.33 | 0.005 |
| 37A | +0.43(402a→410a)[36%]                      | 3.33 | 0.003 |
| 39A | +0.32(393a→403a)[21%]                      | 3.34 | 0.003 |
| 40A | +0.32(393a→403a)[21%]                      | 3.35 | 0.004 |

<sup>a</sup>Excitation energy in eV. <sup>b</sup>Oscillator strength. <sup>c</sup>Transition moment direction.

---

**Table S10.** Symmetry-allowed TD-M06 excited states of the Monomer.

|                                                                    | State                                                              | Main configuration( $ C  \geq 0.30$ )                              | $E^a$ | $f^b$ | $p^c$ |
|--------------------------------------------------------------------|--------------------------------------------------------------------|--------------------------------------------------------------------|-------|-------|-------|
| $C_{4v}$                                                           | 1E                                                                 | +0.69(13a <sub>2</sub> →34e)[97%]                                  | 1.82  | 0.547 | x+y   |
|                                                                    |                                                                    | +0.69(13a <sub>2</sub> →34e)[97%]                                  | 1.82  | 0.547 | x+y   |
|                                                                    | 2E                                                                 | +0.69(22a <sub>1</sub> →34e)[95%]                                  | 2.85  | 0.049 | x+y   |
|                                                                    |                                                                    | +0.69(22a <sub>1</sub> →34e)[95%]                                  | 2.85  | 0.049 | x+y   |
|                                                                    | 3E                                                                 | +0.60(14b <sub>1</sub> →34e)[72%]+0.35(15b <sub>1</sub> →34e)[25%] | 3.52  | 0.019 | x+y   |
|                                                                    |                                                                    | +0.60(14b <sub>1</sub> →34e)[72%]+0.35(15b <sub>1</sub> →34e)[25%] | 3.52  | 0.019 | x+y   |
|                                                                    | 4E                                                                 | +0.44(21a <sub>1</sub> →34e)[40%]+0.53(13a <sub>2</sub> →35e)[56%] | 3.66  | 0.161 | x+y   |
|                                                                    |                                                                    | +0.44(21a <sub>1</sub> →34e)[40%]+0.53(13a <sub>2</sub> →35e)[56%] | 3.66  | 0.161 | x+y   |
|                                                                    | 1A <sub>1</sub>                                                    | -0.31(32e→34e)[20%]-0.39(33e→34e)[30%]                             | 3.67  | 0.001 | z     |
|                                                                    | 5E                                                                 | +0.51(21a <sub>1</sub> →34e)[52%]-0.45(13a <sub>2</sub> →35e)[41%] | 3.72  | 0.703 | x+y   |
|                                                                    |                                                                    | +0.51(21a <sub>1</sub> →34e)[52%]-0.45(13a <sub>2</sub> →35e)[41%] | 3.72  | 0.703 | x+y   |
|                                                                    | 2A <sub>1</sub>                                                    | +0.37(32e→34e)[27%]-0.31(33e→34e)[19%]                             | 3.76  | 0.007 | z     |
|                                                                    | 6E                                                                 | -0.35(14b <sub>1</sub> →34e)[24%]+0.59(15b <sub>1</sub> →34e)[70%] | 3.80  | 0.083 | x+y   |
|                                                                    |                                                                    | -0.35(14b <sub>1</sub> →34e)[24%]+0.59(15b <sub>1</sub> →34e)[70%] | 3.80  | 0.083 | x+y   |
|                                                                    | 3A <sub>1</sub>                                                    | -0.47(31e→34e)[45%]+0.47(31e→34e)[45%]                             | 4.02  | 0.010 | z     |
|                                                                    | 7E                                                                 | +0.48(17b <sub>2</sub> →34e)[46%]+0.49(13a <sub>2</sub> →36e)[49%] | 4.10  | 0.004 | x+y   |
|                                                                    |                                                                    | -0.48(17b <sub>2</sub> →34e)[46%]+0.49(13a <sub>2</sub> →36e)[49%] | 4.10  | 0.004 | x+y   |
|                                                                    | 8E                                                                 | -0.45(17b <sub>2</sub> →34e)[40%]+0.50(13a <sub>2</sub> →36e)[49%] | 4.12  | 0.024 | x+y   |
|                                                                    |                                                                    | +0.45(17b <sub>2</sub> →34e)[40%]+0.50(13a <sub>2</sub> →36e)[49%] | 4.12  | 0.024 | x+y   |
|                                                                    | 9E                                                                 | +0.47(20a <sub>1</sub> →34e)[44%]+0.47(12a <sub>2</sub> →34e)[44%] | 4.21  | 0.038 | x+y   |
| +0.47(20a <sub>1</sub> →34e)[44%]-0.47(12a <sub>2</sub> →34e)[44%] |                                                                    | 4.21                                                               | 0.098 | x+y   |       |
| 10E                                                                | -0.45(20a <sub>1</sub> →34e)[40%]+0.50(12a <sub>2</sub> →34e)[50%] | 4.37                                                               | 0.098 | x+y   |       |

+0.45(20a<sub>1</sub>→34e)[40%]+0.50(12a<sub>2</sub>→34e)[50%]

4.37

0.043

x+y

<sup>a</sup>Excitation energy in eV. <sup>b</sup>Oscillator strength. <sup>c</sup>Transition moment direction.

---

**Table S11.** Geometry optimized coordinates for the PbPc monomer.

|    |   |             |             |             |
|----|---|-------------|-------------|-------------|
| 82 | 0 | 0.00000000  | 0.00000000  | 1.27463300  |
| 7  | 0 | 0.00000000  | 1.99704600  | 0.05417600  |
| 7  | 0 | 1.99704600  | 0.00000000  | 0.05417600  |
| 7  | 0 | -1.99704600 | 0.00000000  | 0.05417600  |
| 7  | 0 | 0.00000000  | -1.99704600 | 0.05417600  |
| 7  | 0 | 2.37809400  | 2.37809400  | -0.14132800 |
| 7  | 0 | -2.37809400 | 2.37809400  | -0.14132800 |
| 7  | 0 | 2.37809400  | -2.37809400 | -0.14132800 |
| 7  | 0 | -2.37809400 | -2.37809400 | -0.14132800 |
| 6  | 0 | 1.11374100  | 2.76655000  | -0.11911600 |
| 6  | 0 | 2.76655000  | -1.11374100 | -0.11911600 |
| 6  | 0 | -2.76655000 | 1.11374100  | -0.11911600 |
| 6  | 0 | -1.11374100 | -2.76655000 | -0.11911600 |
| 6  | 0 | -1.11374100 | 2.76655000  | -0.11911600 |
| 6  | 0 | 2.76655000  | 1.11374100  | -0.11911600 |
| 6  | 0 | -2.76655000 | -1.11374100 | -0.11911600 |
| 6  | 0 | 1.11374100  | -2.76655000 | -0.11911600 |
| 6  | 0 | 0.70091600  | 4.13569500  | -0.36824800 |
| 6  | 0 | 4.13569500  | -0.70091600 | -0.36824800 |
| 6  | 0 | -4.13569500 | 0.70091600  | -0.36824800 |
| 6  | 0 | -0.70091600 | -4.13569500 | -0.36824800 |
| 6  | 0 | -0.70091600 | 4.13569500  | -0.36824800 |
| 6  | 0 | 4.13569500  | 0.70091600  | -0.36824800 |
| 6  | 0 | -4.13569500 | -0.70091600 | -0.36824800 |
| 6  | 0 | 0.70091600  | -4.13569500 | -0.36824800 |
| 6  | 0 | 1.39401700  | 5.31678700  | -0.58316200 |
| 6  | 0 | -1.39401700 | 5.31678700  | -0.58316200 |
| 6  | 0 | 5.31678700  | -1.39401700 | -0.58316200 |
| 6  | 0 | 5.31678700  | 1.39401700  | -0.58316200 |
| 6  | 0 | -5.31678700 | 1.39401700  | -0.58316200 |
| 6  | 0 | -5.31678700 | -1.39401700 | -0.58316200 |
| 6  | 0 | -1.39401700 | -5.31678700 | -0.58316200 |
| 6  | 0 | 1.39401700  | -5.31678700 | -0.58316200 |
| 6  | 0 | 0.70156800  | 6.49676800  | -0.79787300 |
| 6  | 0 | -0.70156800 | 6.49676800  | -0.79787300 |
| 6  | 0 | 6.49676800  | -0.70156800 | -0.79787300 |
| 6  | 0 | 6.49676800  | 0.70156800  | -0.79787300 |

|   |   |             |             |             |
|---|---|-------------|-------------|-------------|
| 6 | 0 | -6.49676800 | 0.70156800  | -0.79787300 |
| 6 | 0 | -6.49676800 | -0.70156800 | -0.79787300 |
| 6 | 0 | -0.70156800 | -6.49676800 | -0.79787300 |
| 6 | 0 | 0.70156800  | -6.49676800 | -0.79787300 |
| 1 | 0 | 1.24507400  | 7.42294000  | -0.96640100 |
| 1 | 0 | -1.24507400 | 7.42294000  | -0.96640100 |
| 1 | 0 | 2.48253900  | 5.31678700  | -0.58316200 |
| 1 | 0 | -2.48253900 | 5.31678700  | -0.58316200 |
| 1 | 0 | 5.31678700  | -2.48253900 | -0.58316200 |
| 1 | 0 | 5.31678700  | 2.48253900  | -0.58316200 |
| 1 | 0 | 7.42294000  | -1.24507400 | -0.96640100 |
| 1 | 0 | 7.42294000  | 1.24507400  | -0.96640100 |
| 1 | 0 | -5.31678700 | 2.48253900  | -0.58316200 |
| 1 | 0 | -5.31678700 | -2.48253900 | -0.58316200 |
| 1 | 0 | -7.42294000 | 1.24507400  | -0.96640100 |
| 1 | 0 | -7.42294000 | -1.24507400 | -0.96640100 |
| 1 | 0 | -2.48253900 | -5.31678700 | -0.58316200 |
| 1 | 0 | 2.48253900  | -5.31678700 | -0.58316200 |
| 1 | 0 | -1.24507400 | -7.42294000 | -0.96640100 |
| 1 | 0 | 1.24507400  | -7.42294000 | -0.96640100 |



**Table S12.** Geometry optimized coordinates for the Type 1 dimer.

|    |   |             |             |            |
|----|---|-------------|-------------|------------|
| 82 | 0 | 0.00000000  | 0.00000000  | 3.10255100 |
| 7  | 0 | 0.00000000  | 1.99700000  | 1.88205100 |
| 7  | 0 | 1.99700000  | 0.00000000  | 1.88205100 |
| 7  | 0 | -1.99700000 | 0.00000000  | 1.88205100 |
| 7  | 0 | 0.00000000  | -1.99700000 | 1.88205100 |
| 7  | 0 | 2.37807100  | 2.37807100  | 1.68655100 |
| 7  | 0 | -2.37807100 | 2.37807100  | 1.68655100 |
| 7  | 0 | 2.37807100  | -2.37807100 | 1.68655100 |
| 7  | 0 | -2.37807100 | -2.37807100 | 1.68655100 |
| 6  | 0 | 1.11373300  | 2.76653400  | 1.70885100 |
| 6  | 0 | 2.76653400  | -1.11373300 | 1.70885100 |
| 6  | 0 | -2.76653400 | 1.11373300  | 1.70885100 |
| 6  | 0 | -1.11373300 | -2.76653400 | 1.70885100 |
| 6  | 0 | -1.11373300 | 2.76653400  | 1.70885100 |
| 6  | 0 | 2.76653400  | 1.11373300  | 1.70885100 |
| 6  | 0 | -2.76653400 | -1.11373300 | 1.70885100 |
| 6  | 0 | 1.11373300  | -2.76653400 | 1.70885100 |
| 6  | 0 | 0.70092400  | 4.13572400  | 1.45965100 |
| 6  | 0 | 4.13572400  | -0.70092400 | 1.45965100 |
| 6  | 0 | -4.13572400 | 0.70092400  | 1.45965100 |
| 6  | 0 | -0.70092400 | -4.13572400 | 1.45965100 |
| 6  | 0 | -0.70092400 | 4.13572400  | 1.45965100 |
| 6  | 0 | 4.13572400  | 0.70092400  | 1.45965100 |
| 6  | 0 | -4.13572400 | -0.70092400 | 1.45965100 |
| 6  | 0 | 0.70092400  | -4.13572400 | 1.45965100 |
| 6  | 0 | 1.39402400  | 5.31680600  | 1.24468800 |
| 6  | 0 | -1.39402400 | 5.31680600  | 1.24468800 |
| 6  | 0 | 5.31680600  | -1.39402400 | 1.24468800 |
| 6  | 0 | 5.31680600  | 1.39402400  | 1.24468800 |
| 6  | 0 | -5.31680600 | 1.39402400  | 1.24468800 |
| 6  | 0 | -5.31680600 | -1.39402400 | 1.24468800 |
| 6  | 0 | -1.39402400 | -5.31680600 | 1.24468800 |
| 6  | 0 | 1.39402400  | -5.31680600 | 1.24468800 |
| 6  | 0 | 0.70157400  | 6.49678000  | 1.02992600 |
| 6  | 0 | -0.70157400 | 6.49678000  | 1.02992600 |
| 6  | 0 | 6.49678000  | -0.70157400 | 1.02992600 |
| 6  | 0 | 6.49678000  | 0.70157400  | 1.02992600 |

|    |   |             |             |             |
|----|---|-------------|-------------|-------------|
| 6  | 0 | -6.49678000 | 0.70157400  | 1.02992600  |
| 6  | 0 | -6.49678000 | -0.70157400 | 1.02992600  |
| 6  | 0 | -0.70157400 | -6.49678000 | 1.02992600  |
| 6  | 0 | 0.70157400  | -6.49678000 | 1.02992600  |
| 1  | 0 | 1.24507400  | 7.42293400  | 0.86136100  |
| 1  | 0 | -1.24507400 | 7.42293400  | 0.86136100  |
| 1  | 0 | 2.48252400  | 5.31680600  | 1.24468800  |
| 1  | 0 | -2.48252400 | 5.31680600  | 1.24468800  |
| 1  | 0 | 5.31680600  | -2.48252400 | 1.24468800  |
| 1  | 0 | 5.31680600  | 2.48252400  | 1.24468800  |
| 1  | 0 | 7.42293400  | -1.24507400 | 0.86136100  |
| 1  | 0 | 7.42293400  | 1.24507400  | 0.86136100  |
| 1  | 0 | -5.31680600 | 2.48252400  | 1.24468800  |
| 1  | 0 | -5.31680600 | -2.48252400 | 1.24468800  |
| 1  | 0 | -7.42293400 | 1.24507400  | 0.86136100  |
| 1  | 0 | -7.42293400 | -1.24507400 | 0.86136100  |
| 1  | 0 | -2.48252400 | -5.31680600 | 1.24468800  |
| 1  | 0 | 2.48252400  | -5.31680600 | 1.24468800  |
| 1  | 0 | -1.24507400 | -7.42293400 | 0.86136100  |
| 1  | 0 | 1.24507400  | -7.42293400 | 0.86136100  |
| 82 | 0 | 0.00000000  | 0.00000000  | -0.55321800 |
| 7  | 0 | 0.00000000  | 1.99700000  | -1.77371800 |
| 7  | 0 | 1.99700000  | 0.00000000  | -1.77371800 |
| 7  | 0 | -1.99700000 | 0.00000000  | -1.77371800 |
| 7  | 0 | 0.00000000  | -1.99700000 | -1.77371800 |
| 7  | 0 | 2.37807100  | 2.37807100  | -1.96921800 |
| 7  | 0 | -2.37807100 | 2.37807100  | -1.96921800 |
| 7  | 0 | 2.37807100  | -2.37807100 | -1.96921800 |
| 7  | 0 | -2.37807100 | -2.37807100 | -1.96921800 |
| 6  | 0 | 1.11373300  | 2.76653400  | -1.94691800 |
| 6  | 0 | 2.76653400  | -1.11373300 | -1.94691800 |
| 6  | 0 | -2.76653400 | 1.11373300  | -1.94691800 |
| 6  | 0 | -1.11373300 | -2.76653400 | -1.94691800 |
| 6  | 0 | -1.11373300 | 2.76653400  | -1.94691800 |
| 6  | 0 | 2.76653400  | 1.11373300  | -1.94691800 |
| 6  | 0 | -2.76653400 | -1.11373300 | -1.94691800 |
| 6  | 0 | 1.11373300  | -2.76653400 | -1.94691800 |
| 6  | 0 | 0.70092400  | 4.13572400  | -2.19611800 |
| 6  | 0 | 4.13572400  | -0.70092400 | -2.19611800 |

|   |   |             |             |             |
|---|---|-------------|-------------|-------------|
| 6 | 0 | -4.13572400 | 0.70092400  | -2.19611800 |
| 6 | 0 | -0.70092400 | -4.13572400 | -2.19611800 |
| 6 | 0 | -0.70092400 | 4.13572400  | -2.19611800 |
| 6 | 0 | 4.13572400  | 0.70092400  | -2.19611800 |
| 6 | 0 | -4.13572400 | -0.70092400 | -2.19611800 |
| 6 | 0 | 0.70092400  | -4.13572400 | -2.19611800 |
| 6 | 0 | 1.39402400  | 5.31680600  | -2.41108100 |
| 6 | 0 | -1.39402400 | 5.31680600  | -2.41108100 |
| 6 | 0 | 5.31680600  | -1.39402400 | -2.41108100 |
| 6 | 0 | 5.31680600  | 1.39402400  | -2.41108100 |
| 6 | 0 | -5.31680600 | 1.39402400  | -2.41108100 |
| 6 | 0 | -5.31680600 | -1.39402400 | -2.41108100 |
| 6 | 0 | -1.39402400 | -5.31680600 | -2.41108100 |
| 6 | 0 | 1.39402400  | -5.31680600 | -2.41108100 |
| 6 | 0 | 0.70157400  | 6.49678000  | -2.62584300 |
| 6 | 0 | -0.70157400 | 6.49678000  | -2.62584300 |
| 6 | 0 | 6.49678000  | -0.70157400 | -2.62584300 |
| 6 | 0 | 6.49678000  | 0.70157400  | -2.62584300 |
| 6 | 0 | -6.49678000 | 0.70157400  | -2.62584300 |
| 6 | 0 | -6.49678000 | -0.70157400 | -2.62584300 |
| 6 | 0 | -0.70157400 | -6.49678000 | -2.62584300 |
| 6 | 0 | 0.70157400  | -6.49678000 | -2.62584300 |
| 1 | 0 | 1.24507400  | 7.42293400  | -2.79440800 |
| 1 | 0 | -1.24507400 | 7.42293400  | -2.79440800 |
| 1 | 0 | 2.48252400  | 5.31680600  | -2.41108100 |
| 1 | 0 | -2.48252400 | 5.31680600  | -2.41108100 |
| 1 | 0 | 5.31680600  | -2.48252400 | -2.41108100 |
| 1 | 0 | 5.31680600  | 2.48252400  | -2.41108100 |
| 1 | 0 | 7.42293400  | -1.24507400 | -2.79440800 |
| 1 | 0 | 7.42293400  | 1.24507400  | -2.79440800 |
| 1 | 0 | -5.31680600 | 2.48252400  | -2.41108100 |
| 1 | 0 | -5.31680600 | -2.48252400 | -2.41108100 |
| 1 | 0 | -7.42293400 | 1.24507400  | -2.79440800 |
| 1 | 0 | -7.42293400 | -1.24507400 | -2.79440800 |
| 1 | 0 | -2.48252400 | -5.31680600 | -2.41108100 |
| 1 | 0 | 2.48252400  | -5.31680600 | -2.41108100 |
| 1 | 0 | -1.24507400 | -7.42293400 | -2.79440800 |
| 1 | 0 | 1.24507400  | -7.42293400 | -2.79440800 |

**Table S13.** Geometry optimized coordinates for the Type 2 dimer.

|    |   |            |             |             |
|----|---|------------|-------------|-------------|
| 82 | 0 | 3.23963700 | 2.32528400  | 0.00000000  |
| 7  | 0 | 2.01913700 | 0.32828400  | 0.00000000  |
| 7  | 0 | 2.01913700 | 2.32528400  | 1.99700000  |
| 7  | 0 | 2.01913700 | 2.32528400  | -1.99700000 |
| 7  | 0 | 2.01913700 | 4.32228400  | 0.00000000  |
| 7  | 0 | 1.82363700 | -0.05278700 | 2.37807100  |
| 7  | 0 | 1.82363700 | -0.05278700 | -2.37807100 |
| 7  | 0 | 1.82363700 | 4.70335400  | 2.37807100  |
| 7  | 0 | 1.82363700 | 4.70335400  | -2.37807100 |
| 6  | 0 | 1.84593700 | -0.44125100 | 1.11373300  |
| 6  | 0 | 1.84593700 | 3.43901700  | 2.76653400  |
| 6  | 0 | 1.84593700 | 1.21155100  | -2.76653400 |
| 6  | 0 | 1.84593700 | 5.09181800  | -1.11373300 |
| 6  | 0 | 1.84593700 | -0.44125100 | -1.11373300 |
| 6  | 0 | 1.84593700 | 1.21155100  | 2.76653400  |
| 6  | 0 | 1.84593700 | 3.43901700  | -2.76653400 |
| 6  | 0 | 1.84593700 | 5.09181800  | 1.11373300  |
| 6  | 0 | 1.59673700 | -1.81044100 | 0.70092400  |
| 6  | 0 | 1.59673700 | 3.02620700  | 4.13572400  |
| 6  | 0 | 1.59673700 | 1.62436000  | -4.13572400 |
| 6  | 0 | 1.59673700 | 6.46100800  | -0.70092400 |
| 6  | 0 | 1.59673700 | -1.81044100 | -0.70092400 |
| 6  | 0 | 1.59673700 | 1.62436000  | 4.13572400  |
| 6  | 0 | 1.59673700 | 3.02620700  | -4.13572400 |
| 6  | 0 | 1.59673700 | 6.46100800  | 0.70092400  |
| 6  | 0 | 1.38177400 | -2.99152200 | 1.39402400  |
| 6  | 0 | 1.38177400 | -2.99152200 | -1.39402400 |
| 6  | 0 | 1.38177400 | 3.71930700  | 5.31680600  |
| 6  | 0 | 1.38177400 | 0.93126000  | 5.31680600  |
| 6  | 0 | 1.38177400 | 0.93126000  | -5.31680600 |
| 6  | 0 | 1.38177400 | 3.71930700  | -5.31680600 |
| 6  | 0 | 1.38177400 | 7.64208900  | -1.39402400 |
| 6  | 0 | 1.38177400 | 7.64208900  | 1.39402400  |
| 6  | 0 | 1.16701200 | -4.17149600 | 0.70157400  |
| 6  | 0 | 1.16701200 | -4.17149600 | -0.70157400 |
| 6  | 0 | 1.16701200 | 3.02685700  | 6.49678000  |
| 6  | 0 | 1.16701200 | 1.62371000  | 6.49678000  |

|    |   |             |             |             |
|----|---|-------------|-------------|-------------|
| 6  | 0 | 1.16701200  | 1.62371000  | -6.49678000 |
| 6  | 0 | 1.16701200  | 3.02685700  | -6.49678000 |
| 6  | 0 | 1.16701200  | 8.82206300  | -0.70157400 |
| 6  | 0 | 1.16701200  | 8.82206300  | 0.70157400  |
| 1  | 0 | 0.99844700  | -5.09765100 | 1.24507400  |
| 1  | 0 | 0.99844700  | -5.09765100 | -1.24507400 |
| 1  | 0 | 1.38177400  | -2.99152200 | 2.48252400  |
| 1  | 0 | 1.38177400  | -2.99152200 | -2.48252400 |
| 1  | 0 | 1.38177400  | 4.80780700  | 5.31680600  |
| 1  | 0 | 1.38177400  | -0.15724000 | 5.31680600  |
| 1  | 0 | 0.99844700  | 3.57035700  | 7.42293400  |
| 1  | 0 | 0.99844700  | 1.08021000  | 7.42293400  |
| 1  | 0 | 1.38177400  | -0.15724000 | -5.31680600 |
| 1  | 0 | 1.38177400  | 4.80780700  | -5.31680600 |
| 1  | 0 | 0.99844700  | 1.08021000  | -7.42293400 |
| 1  | 0 | 0.99844700  | 3.57035700  | -7.42293400 |
| 1  | 0 | 1.38177400  | 7.64208900  | -2.48252400 |
| 1  | 0 | 1.38177400  | 7.64208900  | 2.48252400  |
| 1  | 0 | 0.99844700  | 9.74821800  | -1.24507400 |
| 1  | 0 | 0.99844700  | 9.74821800  | 1.24507400  |
| 82 | 0 | -3.23963700 | -2.32528400 | 0.00000000  |
| 7  | 0 | -2.01913700 | -0.32828400 | 0.00000000  |
| 7  | 0 | -2.01913700 | -2.32528400 | 1.99700000  |
| 7  | 0 | -2.01913700 | -2.32528400 | -1.99700000 |
| 7  | 0 | -2.01913700 | -4.32228400 | 0.00000000  |
| 7  | 0 | -1.82363700 | 0.05278700  | 2.37807100  |
| 7  | 0 | -1.82363700 | 0.05278700  | -2.37807100 |
| 7  | 0 | -1.82363700 | -4.70335400 | 2.37807100  |
| 7  | 0 | -1.82363700 | -4.70335400 | -2.37807100 |
| 6  | 0 | -1.84593700 | 0.44125100  | 1.11373300  |
| 6  | 0 | -1.84593700 | -3.43901700 | 2.76653400  |
| 6  | 0 | -1.84593700 | -1.21155100 | -2.76653400 |
| 6  | 0 | -1.84593700 | -5.09181800 | -1.11373300 |
| 6  | 0 | -1.84593700 | 0.44125100  | -1.11373300 |
| 6  | 0 | -1.84593700 | -1.21155100 | 2.76653400  |
| 6  | 0 | -1.84593700 | -3.43901700 | -2.76653400 |
| 6  | 0 | -1.84593700 | -5.09181800 | 1.11373300  |
| 6  | 0 | -1.59673700 | 1.81044100  | 0.70092400  |
| 6  | 0 | -1.59673700 | -3.02620700 | 4.13572400  |

|   |   |             |             |             |
|---|---|-------------|-------------|-------------|
| 6 | 0 | -1.59673700 | -1.62436000 | -4.13572400 |
| 6 | 0 | -1.59673700 | -6.46100800 | -0.70092400 |
| 6 | 0 | -1.59673700 | 1.81044100  | -0.70092400 |
| 6 | 0 | -1.59673700 | -1.62436000 | 4.13572400  |
| 6 | 0 | -1.59673700 | -3.02620700 | -4.13572400 |
| 6 | 0 | -1.59673700 | -6.46100800 | 0.70092400  |
| 6 | 0 | -1.38177400 | 2.99152200  | 1.39402400  |
| 6 | 0 | -1.38177400 | 2.99152200  | -1.39402400 |
| 6 | 0 | -1.38177400 | -3.71930700 | 5.31680600  |
| 6 | 0 | -1.38177400 | -0.93126000 | 5.31680600  |
| 6 | 0 | -1.38177400 | -0.93126000 | -5.31680600 |
| 6 | 0 | -1.38177400 | -3.71930700 | -5.31680600 |
| 6 | 0 | -1.38177400 | -7.64208900 | -1.39402400 |
| 6 | 0 | -1.38177400 | -7.64208900 | 1.39402400  |
| 6 | 0 | -1.16701200 | 4.17149600  | 0.70157400  |
| 6 | 0 | -1.16701200 | 4.17149600  | -0.70157400 |
| 6 | 0 | -1.16701200 | -3.02685700 | 6.49678000  |
| 6 | 0 | -1.16701200 | -1.62371000 | 6.49678000  |
| 6 | 0 | -1.16701200 | -1.62371000 | -6.49678000 |
| 6 | 0 | -1.16701200 | -3.02685700 | -6.49678000 |
| 6 | 0 | -1.16701200 | -8.82206300 | -0.70157400 |
| 6 | 0 | -1.16701200 | -8.82206300 | 0.70157400  |
| 1 | 0 | -0.99844700 | 5.09765100  | 1.24507400  |
| 1 | 0 | -0.99844700 | 5.09765100  | -1.24507400 |
| 1 | 0 | -1.38177400 | 2.99152200  | 2.48252400  |
| 1 | 0 | -1.38177400 | 2.99152200  | -2.48252400 |
| 1 | 0 | -1.38177400 | -4.80780700 | 5.31680600  |
| 1 | 0 | -1.38177400 | 0.15724000  | 5.31680600  |
| 1 | 0 | -0.99844700 | -3.57035700 | 7.42293400  |
| 1 | 0 | -0.99844700 | -1.08021000 | 7.42293400  |
| 1 | 0 | -1.38177400 | 0.15724000  | -5.31680600 |
| 1 | 0 | -1.38177400 | -4.80780700 | -5.31680600 |
| 1 | 0 | -0.99844700 | -1.08021000 | -7.42293400 |
| 1 | 0 | -0.99844700 | -3.57035700 | -7.42293400 |
| 1 | 0 | -1.38177400 | -7.64208900 | -2.48252400 |
| 1 | 0 | -1.38177400 | -7.64208900 | 2.48252400  |
| 1 | 0 | -0.99844700 | -9.74821800 | -1.24507400 |
| 1 | 0 | -0.99844700 | -9.74821800 | 1.24507400  |

**Table S14.** Geometry optimized coordinates for the Type 3 dimer.

|    |   |            |             |             |
|----|---|------------|-------------|-------------|
| 82 | 0 | 0.13747700 | 3.09432900  | 0.00000000  |
| 7  | 0 | 1.35797700 | 1.68223700  | 1.41209200  |
| 7  | 0 | 1.35797700 | 1.68223700  | -1.41209200 |
| 7  | 0 | 1.35797700 | 4.50642100  | 1.41209200  |
| 7  | 0 | 1.35797700 | 4.50642100  | -1.41209200 |
| 7  | 0 | 1.55347700 | -0.26877100 | 0.00000000  |
| 7  | 0 | 1.55347700 | 3.09432900  | 3.36310000  |
| 7  | 0 | 1.55347700 | 3.09432900  | -3.36310000 |
| 7  | 0 | 1.55347700 | 6.45742900  | 0.00000000  |
| 6  | 0 | 1.53117700 | 0.35056600  | 1.16870700  |
| 6  | 0 | 1.53117700 | 1.92562200  | -2.74376300 |
| 6  | 0 | 1.53117700 | 4.26303600  | 2.74376300  |
| 6  | 0 | 1.53117700 | 5.83809200  | -1.16870700 |
| 6  | 0 | 1.53117700 | 1.92562200  | 2.74376300  |
| 6  | 0 | 1.53117700 | 0.35056600  | -1.16870700 |
| 6  | 0 | 1.53117700 | 5.83809200  | 1.16870700  |
| 6  | 0 | 1.53117700 | 4.26303600  | -2.74376300 |
| 6  | 0 | 1.78037700 | -0.32569700 | 2.42877100  |
| 6  | 0 | 1.78037700 | 0.66555800  | -3.42002600 |
| 6  | 0 | 1.78037700 | 5.52310000  | 3.42002600  |
| 6  | 0 | 1.78037700 | 6.51435600  | -2.42877100 |
| 6  | 0 | 1.78037700 | 0.66555800  | 3.42002600  |
| 6  | 0 | 1.78037700 | -0.32569700 | -2.42877100 |
| 6  | 0 | 1.78037700 | 6.51435600  | 2.42877100  |
| 6  | 0 | 1.78037700 | 5.52310000  | -3.42002600 |
| 6  | 0 | 1.99534000 | -1.65094400 | 2.77382600  |
| 6  | 0 | 1.99534000 | 0.32050300  | 4.74527300  |
| 6  | 0 | 1.99534000 | 0.32050300  | -4.74527300 |
| 6  | 0 | 1.99534000 | -1.65094400 | -2.77382600 |
| 6  | 0 | 1.99534000 | 5.86815500  | 4.74527300  |
| 6  | 0 | 1.99534000 | 7.83960200  | 2.77382600  |
| 6  | 0 | 1.99534000 | 7.83960200  | -2.77382600 |
| 6  | 0 | 1.99534000 | 5.86815500  | -4.74527300 |
| 6  | 0 | 2.21010200 | -1.99567500 | 4.09782900  |
| 6  | 0 | 2.21010200 | -1.00350000 | 5.09000400  |
| 6  | 0 | 2.21010200 | -1.00350000 | -5.09000400 |
| 6  | 0 | 2.21010200 | -1.99567500 | -4.09782900 |

|    |   |             |             |             |
|----|---|-------------|-------------|-------------|
| 6  | 0 | 2.21010200  | 7.19215900  | 5.09000400  |
| 6  | 0 | 2.21010200  | 8.18433400  | 4.09782900  |
| 6  | 0 | 2.21010200  | 8.18433400  | -4.09782900 |
| 6  | 0 | 2.21010200  | 7.19215900  | -5.09000400 |
| 1  | 0 | 2.37866700  | -3.03487800 | 4.36840700  |
| 1  | 0 | 2.37866700  | -1.27407800 | 6.12920700  |
| 1  | 0 | 1.99534000  | -2.42062900 | 2.00414000  |
| 1  | 0 | 1.99534000  | 1.09018900  | 5.51495900  |
| 1  | 0 | 1.99534000  | 1.09018900  | -5.51495900 |
| 1  | 0 | 1.99534000  | -2.42062900 | -2.00414000 |
| 1  | 0 | 2.37866700  | -1.27407800 | -6.12920700 |
| 1  | 0 | 2.37866700  | -3.03487800 | -4.36840700 |
| 1  | 0 | 1.99534000  | 5.09846900  | 5.51495900  |
| 1  | 0 | 1.99534000  | 8.60928800  | 2.00414000  |
| 1  | 0 | 2.37866700  | 7.46273600  | 6.12920700  |
| 1  | 0 | 2.37866700  | 9.22353600  | 4.36840700  |
| 1  | 0 | 1.99534000  | 8.60928800  | -2.00414000 |
| 1  | 0 | 1.99534000  | 5.09846900  | -5.51495900 |
| 1  | 0 | 2.37866700  | 9.22353600  | -4.36840700 |
| 1  | 0 | 2.37866700  | 7.46273600  | -6.12920700 |
| 82 | 0 | -0.13747700 | -3.09432900 | 0.00000000  |
| 7  | 0 | -1.35797700 | -4.50642100 | 1.41209200  |
| 7  | 0 | -1.35797700 | -1.68223700 | 1.41209200  |
| 7  | 0 | -1.35797700 | -4.50642100 | -1.41209200 |
| 7  | 0 | -1.35797700 | -1.68223700 | -1.41209200 |
| 7  | 0 | -1.55347700 | -3.09432900 | 3.36310000  |
| 7  | 0 | -1.55347700 | -6.45742900 | 0.00000000  |
| 7  | 0 | -1.55347700 | 0.26877100  | 0.00000000  |
| 7  | 0 | -1.55347700 | -3.09432900 | -3.36310000 |
| 6  | 0 | -1.53117700 | -4.26303600 | 2.74376300  |
| 6  | 0 | -1.53117700 | -0.35056600 | 1.16870700  |
| 6  | 0 | -1.53117700 | -5.83809200 | -1.16870700 |
| 6  | 0 | -1.53117700 | -1.92562200 | -2.74376300 |
| 6  | 0 | -1.53117700 | -5.83809200 | 1.16870700  |
| 6  | 0 | -1.53117700 | -1.92562200 | 2.74376300  |
| 6  | 0 | -1.53117700 | -4.26303600 | -2.74376300 |
| 6  | 0 | -1.53117700 | -0.35056600 | -1.16870700 |
| 6  | 0 | -1.78037700 | -5.52310000 | 3.42002600  |
| 6  | 0 | -1.78037700 | 0.32569700  | 2.42877100  |



|   |   |             |             |             |
|---|---|-------------|-------------|-------------|
| 6 | 0 | -1.78037700 | -6.51435600 | -2.42877100 |
| 6 | 0 | -1.78037700 | -0.66555800 | -3.42002600 |
| 6 | 0 | -1.78037700 | -6.51435600 | 2.42877100  |
| 6 | 0 | -1.78037700 | -0.66555800 | 3.42002600  |
| 6 | 0 | -1.78037700 | -5.52310000 | -3.42002600 |
| 6 | 0 | -1.78037700 | 0.32569700  | -2.42877100 |
| 6 | 0 | -1.99534000 | -5.86815500 | 4.74527300  |
| 6 | 0 | -1.99534000 | -7.83960200 | 2.77382600  |
| 6 | 0 | -1.99534000 | 1.65094400  | 2.77382600  |
| 6 | 0 | -1.99534000 | -0.32050300 | 4.74527300  |
| 6 | 0 | -1.99534000 | -7.83960200 | -2.77382600 |
| 6 | 0 | -1.99534000 | -5.86815500 | -4.74527300 |
| 6 | 0 | -1.99534000 | -0.32050300 | -4.74527300 |
| 6 | 0 | -1.99534000 | 1.65094400  | -2.77382600 |
| 6 | 0 | -2.21010200 | -7.19215900 | 5.09000400  |
| 6 | 0 | -2.21010200 | -8.18433400 | 4.09782900  |
| 6 | 0 | -2.21010200 | 1.99567500  | 4.09782900  |
| 6 | 0 | -2.21010200 | 1.00350000  | 5.09000400  |
| 6 | 0 | -2.21010200 | -8.18433400 | -4.09782900 |
| 6 | 0 | -2.21010200 | -7.19215900 | -5.09000400 |
| 6 | 0 | -2.21010200 | 1.00350000  | -5.09000400 |
| 6 | 0 | -2.21010200 | 1.99567500  | -4.09782900 |
| 1 | 0 | -2.37866700 | -7.46273600 | 6.12920700  |
| 1 | 0 | -2.37866700 | -9.22353600 | 4.36840700  |
| 1 | 0 | -1.99534000 | -5.09846900 | 5.51495900  |
| 1 | 0 | -1.99534000 | -8.60928800 | 2.00414000  |
| 1 | 0 | -1.99534000 | 2.42062900  | 2.00414000  |
| 1 | 0 | -1.99534000 | -1.09018900 | 5.51495900  |
| 1 | 0 | -2.37866700 | 3.03487800  | 4.36840700  |
| 1 | 0 | -2.37866700 | 1.27407800  | 6.12920700  |
| 1 | 0 | -1.99534000 | -8.60928800 | -2.00414000 |
| 1 | 0 | -1.99534000 | -5.09846900 | -5.51495900 |
| 1 | 0 | -2.37866700 | -9.22353600 | -4.36840700 |
| 1 | 0 | -2.37866700 | -7.46273600 | -6.12920700 |
| 1 | 0 | -1.99534000 | -1.09018900 | -5.51495900 |
| 1 | 0 | -1.99534000 | 2.42062900  | -2.00414000 |
| 1 | 0 | -2.37866700 | 1.27407800  | -6.12920700 |
| 1 | 0 | -2.37866700 | 3.03487800  | -4.36840700 |

**Table S15.** Geometry optimized coordinates for the Type 4 trimer.

|    |   |             |             |            |
|----|---|-------------|-------------|------------|
| 82 | 0 | 0.00000000  | 0.00000000  | 4.92956900 |
| 7  | 0 | 0.00000000  | 1.99700000  | 3.70906900 |
| 7  | 0 | 1.99700000  | 0.00000000  | 3.70906900 |
| 7  | 0 | -1.99700000 | 0.00000000  | 3.70906900 |
| 7  | 0 | 0.00000000  | -1.99700000 | 3.70906900 |
| 7  | 0 | 2.37807100  | 2.37807100  | 3.51356900 |
| 7  | 0 | -2.37807100 | 2.37807100  | 3.51356900 |
| 7  | 0 | 2.37807100  | -2.37807100 | 3.51356900 |
| 7  | 0 | -2.37807100 | -2.37807100 | 3.51356900 |
| 6  | 0 | 1.11373300  | 2.76653400  | 3.53586900 |
| 6  | 0 | 2.76653400  | -1.11373300 | 3.53586900 |
| 6  | 0 | -2.76653400 | 1.11373300  | 3.53586900 |
| 6  | 0 | -1.11373300 | -2.76653400 | 3.53586900 |
| 6  | 0 | -1.11373300 | 2.76653400  | 3.53586900 |
| 6  | 0 | 2.76653400  | 1.11373300  | 3.53586900 |
| 6  | 0 | -2.76653400 | -1.11373300 | 3.53586900 |
| 6  | 0 | 1.11373300  | -2.76653400 | 3.53586900 |
| 6  | 0 | 0.70092400  | 4.13572400  | 3.28666900 |
| 6  | 0 | 4.13572400  | -0.70092400 | 3.28666900 |
| 6  | 0 | -4.13572400 | 0.70092400  | 3.28666900 |
| 6  | 0 | -0.70092400 | -4.13572400 | 3.28666900 |
| 6  | 0 | -0.70092400 | 4.13572400  | 3.28666900 |
| 6  | 0 | 4.13572400  | 0.70092400  | 3.28666900 |
| 6  | 0 | -4.13572400 | -0.70092400 | 3.28666900 |
| 6  | 0 | 0.70092400  | -4.13572400 | 3.28666900 |
| 6  | 0 | 1.39402400  | 5.31680600  | 3.07170600 |
| 6  | 0 | -1.39402400 | 5.31680600  | 3.07170600 |
| 6  | 0 | 5.31680600  | -1.39402400 | 3.07170600 |
| 6  | 0 | 5.31680600  | 1.39402400  | 3.07170600 |
| 6  | 0 | -5.31680600 | 1.39402400  | 3.07170600 |
| 6  | 0 | -5.31680600 | -1.39402400 | 3.07170600 |
| 6  | 0 | -1.39402400 | -5.31680600 | 3.07170600 |
| 6  | 0 | 1.39402400  | -5.31680600 | 3.07170600 |
| 6  | 0 | 0.70157400  | 6.49678000  | 2.85694400 |
| 6  | 0 | -0.70157400 | 6.49678000  | 2.85694400 |
| 6  | 0 | 6.49678000  | -0.70157400 | 2.85694400 |
| 6  | 0 | 6.49678000  | 0.70157400  | 2.85694400 |

|    |   |             |             |             |
|----|---|-------------|-------------|-------------|
| 6  | 0 | -6.49678000 | 0.70157400  | 2.85694400  |
| 6  | 0 | -6.49678000 | -0.70157400 | 2.85694400  |
| 6  | 0 | -0.70157400 | -6.49678000 | 2.85694400  |
| 6  | 0 | 0.70157400  | -6.49678000 | 2.85694400  |
| 1  | 0 | 1.24507400  | 7.42293400  | 2.68837900  |
| 1  | 0 | -1.24507400 | 7.42293400  | 2.68837900  |
| 1  | 0 | 2.48252400  | 5.31680600  | 3.07170600  |
| 1  | 0 | -2.48252400 | 5.31680600  | 3.07170600  |
| 1  | 0 | 5.31680600  | -2.48252400 | 3.07170600  |
| 1  | 0 | 5.31680600  | 2.48252400  | 3.07170600  |
| 1  | 0 | 7.42293400  | -1.24507400 | 2.68837900  |
| 1  | 0 | 7.42293400  | 1.24507400  | 2.68837900  |
| 1  | 0 | -5.31680600 | 2.48252400  | 3.07170600  |
| 1  | 0 | -5.31680600 | -2.48252400 | 3.07170600  |
| 1  | 0 | -7.42293400 | 1.24507400  | 2.68837900  |
| 1  | 0 | -7.42293400 | -1.24507400 | 2.68837900  |
| 1  | 0 | -2.48252400 | -5.31680600 | 3.07170600  |
| 1  | 0 | 2.48252400  | -5.31680600 | 3.07170600  |
| 1  | 0 | -1.24507400 | -7.42293400 | 2.68837900  |
| 1  | 0 | 1.24507400  | -7.42293400 | 2.68837900  |
| 82 | 0 | 0.00000000  | 0.00000000  | 1.27518500  |
| 7  | 0 | 0.00000000  | 1.99700000  | 0.05468500  |
| 7  | 0 | 1.99700000  | 0.00000000  | 0.05468500  |
| 7  | 0 | -1.99700000 | 0.00000000  | 0.05468500  |
| 7  | 0 | 0.00000000  | -1.99700000 | 0.05468500  |
| 7  | 0 | 2.37807100  | 2.37807100  | -0.14081500 |
| 7  | 0 | -2.37807100 | 2.37807100  | -0.14081500 |
| 7  | 0 | 2.37807100  | -2.37807100 | -0.14081500 |
| 7  | 0 | -2.37807100 | -2.37807100 | -0.14081500 |
| 7  | 0 | 1.11373300  | 2.76653400  | -0.11851500 |
| 7  | 0 | 2.76653400  | -1.11373300 | -0.11851500 |
| 6  | 0 | -2.76653400 | 1.11373300  | -0.11851500 |
| 6  | 0 | -1.11373300 | -2.76653400 | -0.11851500 |
| 6  | 0 | -1.11373300 | 2.76653400  | -0.11851500 |
| 6  | 0 | 2.76653400  | 1.11373300  | -0.11851500 |
| 6  | 0 | -2.76653400 | -1.11373300 | -0.11851500 |
| 6  | 0 | 1.11373300  | -2.76653400 | -0.11851500 |
| 6  | 0 | 0.70092400  | 4.13572400  | -0.36771500 |
| 6  | 0 | 4.13572400  | -0.70092400 | -0.36771500 |

|    |   |             |             |             |
|----|---|-------------|-------------|-------------|
| 6  | 0 | -4.13572400 | 0.70092400  | -0.36771500 |
| 6  | 0 | -0.70092400 | -4.13572400 | -0.36771500 |
| 6  | 0 | -0.70092400 | 4.13572400  | -0.36771500 |
| 6  | 0 | 4.13572400  | 0.70092400  | -0.36771500 |
| 6  | 0 | -4.13572400 | -0.70092400 | -0.36771500 |
| 6  | 0 | 0.70092400  | -4.13572400 | -0.36771500 |
| 6  | 0 | 1.39402400  | 5.31680600  | -0.58267800 |
| 6  | 0 | -1.39402400 | 5.31680600  | -0.58267800 |
| 6  | 0 | 5.31680600  | -1.39402400 | -0.58267800 |
| 6  | 0 | 5.31680600  | 1.39402400  | -0.58267800 |
| 6  | 0 | -5.31680600 | 1.39402400  | -0.58267800 |
| 6  | 0 | -5.31680600 | -1.39402400 | -0.58267800 |
| 6  | 0 | -1.39402400 | -5.31680600 | -0.58267800 |
| 6  | 0 | 1.39402400  | -5.31680600 | -0.58267800 |
| 6  | 0 | 0.70157400  | 6.49678000  | -0.79744000 |
| 6  | 0 | -0.70157400 | 6.49678000  | -0.79744000 |
| 6  | 0 | 6.49678000  | -0.70157400 | -0.79744000 |
| 6  | 0 | 6.49678000  | 0.70157400  | -0.79744000 |
| 6  | 0 | -6.49678000 | 0.70157400  | -0.79744000 |
| 6  | 0 | -6.49678000 | -0.70157400 | -0.79744000 |
| 6  | 0 | -0.70157400 | -6.49678000 | -0.79744000 |
| 6  | 0 | 0.70157400  | -6.49678000 | -0.79744000 |
| 1  | 0 | 1.24507400  | 7.42293400  | -0.96600500 |
| 1  | 0 | -1.24507400 | 7.42293400  | -0.96600500 |
| 1  | 0 | 2.48252400  | 5.31680600  | -0.58267800 |
| 1  | 0 | -2.48252400 | 5.31680600  | -0.58267800 |
| 1  | 0 | 5.31680600  | -2.48252400 | -0.58267800 |
| 1  | 0 | 5.31680600  | 2.48252400  | -0.58267800 |
| 1  | 0 | 7.42293400  | -1.24507400 | -0.96600500 |
| 1  | 0 | 7.42293400  | 1.24507400  | -0.96600500 |
| 1  | 0 | -5.31680600 | 2.48252400  | -0.58267800 |
| 1  | 0 | -5.31680600 | -2.48252400 | -0.58267800 |
| 1  | 0 | -7.42293400 | 1.24507400  | -0.96600500 |
| 1  | 0 | -7.42293400 | -1.24507400 | -0.96600500 |
| 1  | 0 | -2.48252400 | -5.31680600 | -0.58267800 |
| 1  | 0 | 2.48252400  | -5.31680600 | -0.58267800 |
| 1  | 0 | -1.24507400 | -7.42293400 | -0.96600500 |
| 1  | 0 | 1.24507400  | -7.42293400 | -0.96600500 |
| 82 | 0 | 0.00000000  | 0.00000000  | -2.38075400 |

|   |   |             |             |             |
|---|---|-------------|-------------|-------------|
| 7 | 0 | 0.00000000  | 1.99700000  | -3.60125400 |
| 7 | 0 | 1.99700000  | 0.00000000  | -3.60125400 |
| 7 | 0 | -1.99700000 | 0.00000000  | -3.60125400 |
| 7 | 0 | 0.00000000  | -1.99700000 | -3.60125400 |
| 7 | 0 | 2.37807100  | 2.37807100  | -3.79675400 |
| 7 | 0 | -2.37807100 | 2.37807100  | -3.79675400 |
| 7 | 0 | 2.37807100  | -2.37807100 | -3.79675400 |
| 7 | 0 | -2.37807100 | -2.37807100 | -3.79675400 |
| 6 | 0 | 1.11373300  | 2.76653400  | -3.77445400 |
| 6 | 0 | 2.76653400  | -1.11373300 | -3.77445400 |
| 6 | 0 | -2.76653400 | 1.11373300  | -3.77445400 |
| 6 | 0 | -1.11373300 | -2.76653400 | -3.77445400 |
| 6 | 0 | -1.11373300 | 2.76653400  | -3.77445400 |
| 6 | 0 | 2.76653400  | 1.11373300  | -3.77445400 |
| 6 | 0 | -2.76653400 | -1.11373300 | -3.77445400 |
| 6 | 0 | 1.11373300  | -2.76653400 | -3.77445400 |
| 6 | 0 | 0.70092400  | 4.13572400  | -4.02365400 |
| 6 | 0 | 4.13572400  | -0.70092400 | -4.02365400 |
| 6 | 0 | -4.13572400 | 0.70092400  | -4.02365400 |
| 6 | 0 | -0.70092400 | -4.13572400 | -4.02365400 |
| 6 | 0 | -0.70092400 | 4.13572400  | -4.02365400 |
| 6 | 0 | 4.13572400  | 0.70092400  | -4.02365400 |
| 6 | 0 | -4.13572400 | -0.70092400 | -4.02365400 |
| 6 | 0 | 0.70092400  | -4.13572400 | -4.02365400 |
| 6 | 0 | 1.39402400  | 5.31680600  | -4.23861800 |
| 6 | 0 | -1.39402400 | 5.31680600  | -4.23861800 |
| 6 | 0 | 5.31680600  | -1.39402400 | -4.23861800 |
| 6 | 0 | 5.31680600  | 1.39402400  | -4.23861800 |
| 6 | 0 | -5.31680600 | 1.39402400  | -4.23861800 |
| 6 | 0 | -5.31680600 | -1.39402400 | -4.23861800 |
| 6 | 0 | -1.39402400 | -5.31680600 | -4.23861800 |
| 6 | 0 | 1.39402400  | -5.31680600 | -4.23861800 |
| 6 | 0 | 0.70157400  | 6.49678000  | -4.45337900 |
| 6 | 0 | -0.70157400 | 6.49678000  | -4.45337900 |
| 6 | 0 | 6.49678000  | -0.70157400 | -4.45337900 |
| 6 | 0 | 6.49678000  | 0.70157400  | -4.45337900 |
| 6 | 0 | -6.49678000 | 0.70157400  | -4.45337900 |
| 6 | 0 | -6.49678000 | -0.70157400 | -4.45337900 |
| 6 | 0 | -0.70157400 | -6.49678000 | -4.45337900 |

|   |   |             |             |             |
|---|---|-------------|-------------|-------------|
| 6 | 0 | 0.70157400  | -6.49678000 | -4.45337900 |
| 1 | 0 | 1.24507400  | 7.42293400  | -4.62194400 |
| 1 | 0 | -1.24507400 | 7.42293400  | -4.62194400 |
| 1 | 0 | 2.48252400  | 5.31680600  | -4.23861800 |
| 1 | 0 | -2.48252400 | 5.31680600  | -4.23861800 |
| 1 | 0 | 5.31680600  | -2.48252400 | -4.23861800 |
| 1 | 0 | 5.31680600  | 2.48252400  | -4.23861800 |
| 1 | 0 | 7.42293400  | -1.24507400 | -4.62194400 |
| 1 | 0 | 7.42293400  | 1.24507400  | -4.62194400 |
| 1 | 0 | -5.31680600 | 2.48252400  | -4.23861800 |
| 1 | 0 | -5.31680600 | -2.48252400 | -4.23861800 |
| 1 | 0 | -7.42293400 | 1.24507400  | -4.62194400 |
| 1 | 0 | -7.42293400 | -1.24507400 | -4.62194400 |
| 1 | 0 | -2.48252400 | -5.31680600 | -4.23861800 |
| 1 | 0 | 2.48252400  | -5.31680600 | -4.23861800 |
| 1 | 0 | -1.24507400 | -7.42293400 | -4.62194400 |
| 1 | 0 | 1.24507400  | -7.42293400 | -4.62194400 |

**Table S16.** Geometry optimized coordinates for the Type 5 trimer.

|    |   |             |             |             |
|----|---|-------------|-------------|-------------|
| 82 | 0 | -0.21688300 | 1.47701500  | 1.63116100  |
| 7  | 0 | -0.48234900 | -0.40053300 | 0.25931200  |
| 7  | 0 | -1.29444900 | 2.24615900  | -0.29883800 |
| 7  | 0 | 1.92563400  | 0.57232000  | 1.36890400  |
| 7  | 0 | 1.11353400  | 3.21901200  | 0.81075300  |
| 7  | 0 | -2.46659400 | 0.23988900  | -0.96187100 |
| 7  | 0 | 1.36795000  | -1.75335500 | 1.02411200  |
| 7  | 0 | -0.56618100 | 4.55012200  | -0.30520300 |
| 7  | 0 | 3.26836300  | 2.55687700  | 1.68078100  |
| 6  | 0 | -1.61219400 | -0.64078500 | -0.46753900 |
| 6  | 0 | -1.39429300 | 3.56836000  | -0.62194700 |
| 6  | 0 | 2.17660400  | -0.76911700 | 1.38091100  |
| 6  | 0 | 2.39450500  | 3.44002800  | 1.22650300  |
| 6  | 0 | 0.18365600  | -1.57429100 | 0.46256600  |
| 6  | 0 | -2.28432200 | 1.54972900  | -0.92948700 |
| 6  | 0 | 3.06663300  | 1.24951400  | 1.68845200  |
| 6  | 0 | 0.59865500  | 4.37353400  | 0.29639800  |
| 6  | 0 | -1.71774200 | -2.06845000 | -0.70801200 |
| 6  | 0 | -2.55440100 | 3.75422700  | -1.47447000 |
| 6  | 0 | 3.55415200  | -0.98266100 | 1.78582200  |
| 6  | 0 | 2.71749300  | 4.84001600  | 1.01936400  |
| 6  | 0 | -0.58753100 | -2.65594800 | -0.12265400 |
| 6  | 0 | -3.11453800 | 2.48380900  | -1.66801900 |
| 6  | 0 | 4.11428900  | 0.28775700  | 1.97937200  |
| 6  | 0 | 1.58728200  | 5.42751400  | 0.43400600  |
| 6  | 0 | -2.65468200 | -2.86026600 | -1.35355100 |
| 6  | 0 | -0.40687500 | -4.02870500 | -0.18936800 |
| 6  | 0 | -3.13589900 | 4.86538600  | -2.06500800 |
| 6  | 0 | -4.24992000 | 2.33873100  | -2.44994600 |
| 6  | 0 | 4.32321700  | -2.11769400 | 1.99024400  |
| 6  | 0 | 5.43723700  | 0.40896100  | 2.37518300  |
| 6  | 0 | 3.84199900  | 5.60795800  | 1.27878700  |
| 6  | 0 | 1.59419200  | 6.77639700  | 0.11460500  |
| 6  | 0 | -2.47419500 | -4.23173600 | -1.42020300 |
| 6  | 0 | -1.34293500 | -4.81977900 | -0.83430200 |
| 6  | 0 | -4.27021700 | 4.72044400  | -2.84620200 |
| 6  | 0 | -4.83087200 | 3.44884800  | -3.03993100 |

|    |   |             |             |             |
|----|---|-------------|-------------|-------------|
| 6  | 0 | 5.64492500  | -1.99660400 | 2.38568400  |
| 6  | 0 | 6.20558100  | -0.72500800 | 2.57941300  |
| 6  | 0 | 3.84890300  | 6.95557600  | 0.95968600  |
| 6  | 0 | 2.71764400  | 7.54361900  | 0.37378500  |
| 1  | 0 | -3.20890400 | -4.85264600 | -1.92640800 |
| 1  | 0 | -1.20127200 | -5.89623800 | -0.88661700 |
| 1  | 0 | -3.53226300 | -2.40408800 | -1.80806700 |
| 1  | 0 | 0.47070700  | -4.48488300 | 0.26514800  |
| 1  | 0 | -2.70096700 | 5.85183500  | -1.91472100 |
| 1  | 0 | -4.68485200 | 1.35228200  | -2.60023300 |
| 1  | 0 | -4.72620300 | 5.59176900  | -3.30927700 |
| 1  | 0 | -5.72119200 | 3.33508400  | -3.65308500 |
| 1  | 0 | 3.88828500  | -3.10414300 | 1.83995800  |
| 1  | 0 | 5.87217000  | 1.39540900  | 2.52546900  |
| 1  | 0 | 6.24799300  | -2.88665000 | 2.54598300  |
| 1  | 0 | 7.24298200  | -0.62996500 | 2.88979200  |
| 1  | 0 | 4.71958100  | 5.15178000  | 1.73330300  |
| 1  | 0 | 0.71661100  | 7.23257500  | -0.33991100 |
| 1  | 0 | 4.73069400  | 7.55776500  | 1.16311400  |
| 1  | 0 | 2.72306300  | 8.60135700  | 0.12332400  |
| 82 | 0 | -5.67593000 | -0.66696500 | -0.59254900 |
| 7  | 0 | -7.00634700 | -2.40896100 | 0.22785900  |
| 7  | 0 | -4.59836400 | -1.43610900 | 1.33745100  |
| 7  | 0 | -7.81844600 | 0.23773100  | -0.33029100 |
| 7  | 0 | -5.41046300 | 1.21058300  | 0.77930000  |
| 7  | 0 | -5.32663100 | -3.74007100 | 1.34381500  |
| 7  | 0 | -9.16117500 | -1.74682600 | -0.64216800 |
| 7  | 0 | -3.42621900 | 0.57016100  | 2.00048400  |
| 7  | 0 | -7.26076300 | 2.56340600  | 0.01450000  |
| 6  | 0 | -6.49146800 | -3.56348300 | 0.74221400  |
| 6  | 0 | -3.60849100 | -0.73967800 | 1.96810000  |
| 6  | 0 | -8.95944600 | -0.43946400 | -0.64983900 |
| 6  | 0 | -6.07646800 | 2.38434100  | 0.57604600  |
| 6  | 0 | -8.28731800 | -2.62997800 | -0.18789100 |
| 6  | 0 | -4.49852000 | -2.75830900 | 1.66055900  |
| 6  | 0 | -8.06941700 | 1.57916700  | -0.34229900 |
| 6  | 0 | -4.28061900 | 1.45083600  | 1.50615100  |
| 6  | 0 | -7.48009400 | -4.61746300 | 0.60460600  |
| 6  | 0 | -2.77827500 | -1.67375900 | 2.70663200  |



|    |   |              |             |             |
|----|---|--------------|-------------|-------------|
| 6  | 0 | -10.00710100 | 0.52229300  | -0.94075900 |
| 6  | 0 | -5.30528200  | 3.46599800  | 1.16126600  |
| 6  | 0 | -8.61030600  | -4.02996500 | 0.01924800  |
| 6  | 0 | -3.33841100  | -2.94417600 | 2.51308200  |
| 6  | 0 | -9.44696500  | 1.79271100  | -0.74721000 |
| 6  | 0 | -4.17507000  | 2.87850000  | 1.74662400  |
| 6  | 0 | -7.48700500  | -5.96634700 | 0.92400700  |
| 6  | 0 | -9.73481200  | -4.79790800 | -0.24017500 |
| 6  | 0 | -1.64289300  | -1.52868000 | 3.48855900  |
| 6  | 0 | -2.75691300  | -4.05533600 | 3.10362000  |
| 6  | 0 | -11.33005000 | 0.40108900  | -1.33657000 |
| 6  | 0 | -10.21603000 | 2.92774500  | -0.95163200 |
| 6  | 0 | -5.48593800  | 4.83875600  | 1.22798100  |
| 6  | 0 | -3.23813100  | 3.67031700  | 2.39216300  |
| 6  | 0 | -8.61045700  | -6.73356900 | 0.66482800  |
| 6  | 0 | -9.74171600  | -6.14552600 | 0.07892700  |
| 6  | 0 | -1.06194000  | -2.63879800 | 4.07854300  |
| 6  | 0 | -1.62259600  | -3.91039400 | 3.88481400  |
| 6  | 0 | -12.09839300 | 1.53505900  | -1.54080100 |
| 6  | 0 | -11.53773800 | 2.80665500  | -1.34707200 |
| 6  | 0 | -4.54987700  | 5.62983000  | 1.87291500  |
| 6  | 0 | -3.41861800  | 5.04178700  | 2.45881500  |
| 1  | 0 | -8.61587500  | -7.79130600 | 0.91528900  |
| 1  | 0 | -10.62350700 | -6.74771400 | -0.12450200 |
| 1  | 0 | -6.60942300  | -6.42252400 | 1.37852300  |
| 1  | 0 | -10.61239300 | -4.34173000 | -0.69469100 |
| 1  | 0 | -1.20796100  | -0.54223200 | 3.63884500  |
| 1  | 0 | -3.19184500  | -5.04178400 | 2.95333400  |
| 1  | 0 | -0.17162100  | -2.52503300 | 4.69169800  |
| 1  | 0 | -1.16661000  | -4.78171800 | 4.34788900  |
| 1  | 0 | -11.76498200 | -0.58535900 | -1.48685700 |
| 1  | 0 | -9.78109700  | 3.91419300  | -0.80134500 |
| 1  | 0 | -13.13579500 | 1.44001600  | -1.85117900 |
| 1  | 0 | -12.14080600 | 3.69670100  | -1.50737100 |
| 1  | 0 | -6.36351900  | 5.29493300  | 0.77346500  |
| 1  | 0 | -2.36054900  | 3.21413900  | 2.84667900  |
| 1  | 0 | -4.69154000  | 6.70628900  | 1.92523000  |
| 1  | 0 | -2.68390900  | 5.66269600  | 2.96502000  |
| 82 | 0 | 6.44891900   | -0.88083400 | -2.18338800 |

|   |   |             |             |             |
|---|---|-------------|-------------|-------------|
| 7 | 0 | 7.52648600  | -1.64997800 | -0.25338800 |
| 7 | 0 | 6.71438600  | 0.99671400  | -0.81153900 |
| 7 | 0 | 5.11850300  | -2.62283100 | -1.36298000 |
| 7 | 0 | 4.30640300  | 0.02386200  | -1.92113000 |
| 7 | 0 | 8.69863100  | 0.35629200  | 0.40964500  |
| 7 | 0 | 6.79821800  | -3.95394100 | -0.24702400 |
| 7 | 0 | 4.86408600  | 2.34953600  | -1.57633900 |
| 7 | 0 | 2.96367400  | -1.96069600 | -2.23300700 |
| 6 | 0 | 8.51635900  | -0.95354800 | 0.37726100  |
| 6 | 0 | 6.04838100  | 2.17047200  | -1.01479300 |
| 6 | 0 | 5.63338100  | -3.77735300 | -0.84862500 |
| 6 | 0 | 3.16540400  | -0.65333300 | -2.24067800 |
| 6 | 0 | 7.62633000  | -2.97217900 | 0.06972000  |
| 6 | 0 | 7.84423100  | 1.23696600  | -0.08468800 |
| 6 | 0 | 3.83753200  | -2.84384700 | -1.77873000 |
| 6 | 0 | 4.05543300  | 1.36529800  | -1.93313800 |
| 6 | 0 | 9.34657400  | -1.88762800 | 1.11579300  |
| 6 | 0 | 6.81956800  | 3.25212900  | -0.42957300 |
| 6 | 0 | 4.64475500  | -4.83133300 | -0.98623300 |
| 6 | 0 | 2.11774800  | 0.30842400  | -2.53159800 |
| 6 | 0 | 8.78643800  | -3.15804600 | 0.92224300  |
| 6 | 0 | 7.94977900  | 2.66463100  | 0.15578500  |
| 6 | 0 | 3.51454400  | -4.24383500 | -1.57159100 |
| 6 | 0 | 2.67788400  | 1.57884200  | -2.33804900 |
| 6 | 0 | 10.48195600 | -1.74255000 | 1.89772000  |
| 6 | 0 | 9.36793600  | -4.26920500 | 1.51278100  |
| 6 | 0 | 6.63891100  | 4.62488600  | -0.36285800 |
| 6 | 0 | 8.88671900  | 3.45644700  | 0.80132400  |
| 6 | 0 | 4.63784500  | -6.18021600 | -0.66683200 |
| 6 | 0 | 2.39003700  | -5.01177700 | -1.83101400 |
| 6 | 0 | 0.79479900  | 0.18722000  | -2.92740900 |
| 6 | 0 | 1.90882000  | 2.71387500  | -2.54247100 |
| 6 | 0 | 11.06290900 | -2.85266700 | 2.48770400  |
| 6 | 0 | 10.50225300 | -4.12426300 | 2.29397500  |
| 6 | 0 | 7.57497200  | 5.41596000  | 0.28207600  |
| 6 | 0 | 8.70623200  | 4.82791700  | 0.86797600  |
| 6 | 0 | 3.51439300  | -6.94743800 | -0.92601100 |
| 6 | 0 | 2.38313300  | -6.35939500 | -1.51191200 |
| 6 | 0 | 0.02645600  | 1.32118900  | -3.13164000 |

|   |   |             |             |             |
|---|---|-------------|-------------|-------------|
| 6 | 0 | 0.58711200  | 2.59278500  | -2.93791100 |
| 1 | 0 | 11.95322800 | -2.73890300 | 3.10085900  |
| 1 | 0 | 10.95824000 | -4.99558800 | 2.75705000  |
| 1 | 0 | 10.91688900 | -0.75610100 | 2.04800600  |
| 1 | 0 | 8.93300400  | -5.25565300 | 1.36249500  |
| 1 | 0 | 5.76133000  | 5.08106400  | -0.81737400 |
| 1 | 0 | 9.76430000  | 3.00027000  | 1.25584000  |
| 1 | 0 | 7.43330900  | 6.49241900  | 0.33439100  |
| 1 | 0 | 9.44094000  | 5.44882700  | 1.37418100  |
| 1 | 0 | 5.51542600  | -6.63639400 | -0.21231600 |
| 1 | 0 | 1.51245600  | -4.55559900 | -2.28553000 |
| 1 | 0 | 3.50897400  | -8.00517600 | -0.67555000 |
| 1 | 0 | 1.50134300  | -6.96158400 | -1.71534100 |
| 1 | 0 | 0.35986700  | -0.79922800 | -3.07769600 |
| 1 | 0 | 2.34375200  | 3.70032400  | -2.39218400 |
| 1 | 0 | -1.01094500 | 1.22614600  | -3.44201800 |
| 1 | 0 | -0.01595700 | 3.48283100  | -3.09821000 |
